# Supplementary material
Source: MDPI journal article supplement (https://www.mdpi.com/2073-445X/6/2/32)
Supplement: s1 [file s1]

## Sheet: S1_Logistic_Regression_Data
UniqueID	tract	rtp	cd	fslp	ftwi	fslpcv	landTenure	luclass	Cultivated
1403	24a	2	0.874232	0.685488	-0.846813	-0.813738	1	2	0
432	24	3	0.221381	1.37495	-0.981557	-0.000115	1	4	0
1381	342-II	3	0.127353	-0.282709	0.071875	0.241271	1	2	1
1069	80b	3	1.13988	0.218054	-0.625846	-1.05855	1	2	0
1185	139	3	-0.598573	0.614011	-0.711503	-0.324226	1	3	0
446	24	3	-0.505045	0.553366	-0.529019	-0.517161	1	4	0
419	198	2	1.47834	0.236019	-0.585322	-0.724869	1	3	0
421	198	1	1.91263	-1.17798	0.925861	0.39511	1	2	0
1410	24a	3	-0.146052	-0.581195	0.04062	-0.318658	1	4	0
231	99	3	2.01935	0.393962	-0.523176	-0.396397	1	2	0
1163	293	1	0.691381	-1.21164	1.02414	1.57384	1	2	0
893	456	3	0.746885	-0.531621	-0.032356	-0.528614	1	2	0
727	603a	3	0.254363	0.589447	-0.616666	0.057611	1	3	0
16	99	3	1.34471	0.355613	-0.45627	0.418871	1	5	0
81	24a	2	0.560859	-0.708116	0.182516	-0.177179	1	2	0
891	456	3	0.651293	-0.808066	0.289115	-0.085901	1	2	0
1300	363b	2	-1.36824	-0.271021	-0.032117	-0.00281	1	3	0
465	25	2	-0.019042	0.5865	-0.460728	0.138249	1	3	0
435	24	1	0.494415	-0.73795	0.634223	1.67189	1	5	0
68	571	2	0.335525	1.14928	-0.920532	-0.353273	1	2	0
646	345	2	1.00895	-0.653925	0.103206	-0.236788	1	2	0
222	99	3	1.34059	-0.418614	-0.053676	-0.227755	1	2	0
466	25	2	0.162235	-0.575384	0.329865	-0.673307	1	2	0
595	262	2	0.118028	2.41518	-1.24889	-0.302954	1	3	0
1301	363b	2	-1.20183	0.444281	-0.260552	0.230269	1	4	0
12	99	2	0.94949	-1.30414	0.996822	-0.114567	1	3	0
547	63	3	1.57296	0.613711	-0.488735	0.194336	1	3	0
8	334	3	1.52936	1.38409	-0.992828	-0.209242	1	3	0
25	99	1	0.713056	-1.47946	3.81751	1.26552	1	3	0
1383	342-I	2	-0.401062	1.13223	-0.907737	-0.622536	1	3	0
1336	262	2	-1.03106	0.116181	-0.337885	-0.021433	1	2	0
19	99	3	1.03261	-1.01558	0.580627	0.499319	1	2	1
858	564	1	-0.993237	0.249521	-0.048576	0.708602	1	5	0
423	198	1	2.20339	-0.565028	0.579393	-0.500926	1	2	0
63	571	1	0.699339	-0.317325	-0.157265	-0.326601	1	2	0
536	314	2	0.847394	-1.29373	1.01132	0.108753	1	2	1
14	99	2	0.95103	-1.59392	1.49466	-0.856008	1	2	1
65	571	1	0.403971	-0.602135	0.01794	-0.502888	1	2	0
1298	363b	2	-1.56685	-0.591653	-0.021035	-0.84757	1	3	0
230	99	2	2.14354	-1.1325	0.615585	-0.527094	1	2	0
441	24	3	0.68006	1.56633	-0.604577	0.171661	1	3	0
224	99	1	2.03383	2.42556	-1.11246	0.174035	1	5	0
20	99	2	1.89409	1.41598	-0.900912	-0.034593	1	5	0
1404	334	2	1.74432	1.11457	-0.790825	-0.143024	1	4	0
232	99	2	1.69866	0.582051	-0.65044	-0.032339	1	4	0
459	25	1	-0.069426	-0.208466	-0.099917	0.282588	1	5	0
443	24	2	0.481761	1.1522	-0.944345	-0.504336	1	4	0
648	345	2	1.03397	0.142794	-0.321199	0.39411	1	3	0
1260	94	3	-1.1182	1.2861	-0.858096	-0.321186	1	3	0
72	571	2	-0.036218	0.777985	-0.693558	-0.50135	1	3	0
729	603a	2	0.285891	0.501591	-0.717812	-0.613527	1	2	1
1149	293	2	1.61229	-0.245843	-0.342002	-1.31411	1	2	0
61	571	2	0.24385	1.19346	-0.876746	-0.558428	1	4	0
649	345	2	0.824295	-0.69188	0.074369	-1.1062	1	2	0
460	25	1	0.142816	-1.86666	4.07236	1.26285	1	5	0
1186	139	2	0.317122	-0.431818	0.386407	1.25712	1	3	0
724	603a	2	-0.190167	-1.16943	0.776409	-0.128003	1	2	0
1293	363b	1	-1.10355	-1.47905	1.50712	1.26608	1	4	0
55	99	1	2.23866	-1.90165	3.12611	-0.547017	1	2	1
1100	1-A-I	3	-0.286528	-1.02438	0.555177	-0.292516	1	2	0
868	613	1	1.59683	-0.766331	0.143579	-0.848242	1	2	1
444	24	2	0.71946	1.94068	-0.939597	-0.000552	1	3	0
440	24	2	0.302683	0.014916	-0.195799	-0.489542	1	4	0
80	24a	3	0.756368	-0.223992	-0.101869	0.346384	1	2	0
473	262	1	0.251572	-0.632128	0.443831	0.771384	1	2	1
625	234b	3	0.016288	-1.42176	1.51177	1.10578	1	3	0
1262	94	3	-1.42133	0.293317	-0.588193	-0.566625	1	5	0
10	334	3	2.05303	1.46335	-1.06734	-0.600584	1	3	0
863	564	3	-1.81565	0.038783	-0.497147	-0.889665	1	4	0
1338	25	3	-0.498487	0.851196	-0.603645	0.018937	1	3	0
447	24	3	-0.428184	0.839698	-0.704388	-0.404749	1	4	0
448	24	2	0.139131	1.43315	-0.995019	-0.34943	1	4	0
1339	22	3	-0.606098	0.706121	-0.524675	0.097873	1	3	0
624	234b	1	-0.00686	-1.44801	2.20675	1.28974	1	5	0
436	24	3	0.321447	-0.904937	0.859258	0.43534	1	2	0
599	262	3	-1.01592	0.387468	-0.508228	-0.135917	1	3	0
434	24	3	0.030996	0.674894	-0.610823	0.069086	1	5	0
103	24a	3	1.40655	-0.249964	-0.179416	-0.019507	1	2	0
717	56	1	0.920926	-1.37621	2.096	2.44395	1	5	0
1175	139	3	0.457305	-0.065117	-0.207208	-0.611767	1	3	0
1169	293	1	0.140911	-1.40527	2.14135	2.83128	1	5	0
453	25	1	-0.244848	-0.370397	1.17028	1.32068	1	5	0
897	456	3	0.758076	1.84148	-1.22396	-0.482345	1	3	0
1223	260A	1	-0.20117	-1.62874	2.71921	3.80198	1	5	0
1158	293	2	0.511158	0.756458	-0.698482	-0.15987	1	5	0
445	24	1	-0.460641	-1.63111	2.11167	0.971905	1	4	0
642	345	1	1.78222	-0.979941	2.42373	2.30653	1	5	0
1182	139	2	-0.099593	0.47093	-0.472263	-0.16278	1	4	0
70	571	3	0.042654	1.57069	-1.01315	-0.353598	1	3	0
869	613	2	1.46914	-0.679828	0.238152	-0.193322	1	2	1
13	99	2	0.915378	-1.4991	1.32927	-0.139364	1	2	1
896	456	3	1.41831	1.23422	-1.00878	-0.569443	1	3	0
1173	139	3	0.913593	-0.770271	0.749158	1.13292	1	5	0
1222	260A	2	-1.11761	1.55641	-1.01801	-0.52299	1	3	0
860	564	3	-1.62943	-0.121593	-0.338753	-0.698538	1	3	0
1342	262	1	0.219004	1.83207	-0.903015	0.15208	1	5	0
870	613	2	1.35827	-0.38213	0.635394	-1.15691	1	2	1
1102	1-A-I	3	-0.560909	-1.14654	0.654825	-0.333736	1	2	1
1400	24a	3	1.03199	0.710527	-0.577451	0.062249	1	3	0
622	234b	2	0.520329	-0.046604	-0.305005	-0.322215	1	4	0
1174	139	1	0.930433	1.66445	-0.915079	0.273888	1	5	0
626	234b	1	1.03815	-1.28162	1.97219	3.23997	1	5	0
1084	139	3	-0.369822	0.895401	-0.815495	-0.260151	1	3	0
425	198	3	1.64913	0.646814	-0.696316	-0.136185	1	3	0
620	234b	2	1.306	0.901269	-0.785108	-0.585342	1	4	0
621	234b	3	1.77775	0.508094	-0.591316	-0.181844	1	4	0
23	99	1	2.25935	-1.77562	3.82347	1.92943	1	5	0
228	99	2	2.10683	0.02234	0.10478	0.360594	1	3	0
456	25	1	0.126713	-1.62272	4.02591	3.26379	1	5	0
225	99	3	1.53704	-0.295233	-0.259166	-0.934999	1	5	0
903	80b	2	0.736271	-0.264954	-0.136361	-0.173481	1	3	0
899	80b	3	0.762517	-0.067724	-0.257718	0.251673	1	3	0
1401	24a	3	0.99593	1.0108	-0.863411	-0.192832	1	3	0
1146	293	2	1.22259	1.30944	-0.825959	0.000053	1	5	0
898	80b	3	0.815187	-0.792991	0.295046	-0.027424	1	2	1
438	24	2	0.362906	-0.036224	-0.052202	-0.237025	1	5	0
482	22	2	-0.584769	1.19049	-0.73728	-0.131796	1	3	0
430	24	3	0.329949	3.11911	-1.6282	-0.522416	1	4	0
721	56	2	0.517456	0.888956	-0.703645	-0.415284	1	5	0
1159	293	3	0.050136	-0.538169	0.00133	-0.401331	1	2	1
865	564	3	-1.8835	-0.720171	0.101783	-0.900649	1	2	0
859	564	3	-1.24965	0.129557	-0.298267	-0.170751	1	4	0
76	24a	3	0.365019	0.210856	-0.348488	0.396243	1	2	0
615	234b	2	1.10861	1.03565	-0.814538	-0.698228	1	4	0
464	25	1	0.341876	-1.7421	2.1734	0.888757	1	2	0
1263	94	2	-1.18162	1.34244	-0.934359	-0.872944	1	4	0
597	262	3	-0.139205	1.89691	-1.17423	-0.371774	1	3	0
1407	24a	3	-0.146841	-0.970472	0.542068	0.087208	1	2	0
1225	260A	3	-0.761321	-0.028669	-0.074164	0.404327	1	3	0
77	24a	2	1.30289	1.23741	-0.880625	0.103611	1	5	0
439	24	1	0.496816	-0.657237	0.679444	1.72875	1	5	0
1304	363b	1	-1.18579	-1.53249	2.10545	4.78473	1	5	0
1296	363b	2	-1.37355	-0.812187	0.736842	1.49956	1	3	0
1148	293	1	1.12506	-1.091	0.592326	-0.4316	1	2	0
472	25	1	0.508185	0.386942	-0.627621	-0.441646	1	4	0
1162	293	2	0.773689	0.472861	-0.491631	-0.196508	1	4	0
645	345	2	1.07019	-0.279004	-0.169858	-0.281546	1	3	0
449	24	2	-0.008317	1.48515	-1.00567	-0.511161	1	3	0
226	99	3	1.55354	-0.582031	0.073349	-0.092009	1	2	0
227	99	2	1.63667	-0.761524	0.216643	-0.201925	1	2	0
11	334	2	1.6015	1.72803	-1.01204	-0.340371	1	5	0
1297	363b	2	-1.50443	-0.9519	0.60434	0.771132	1	4	0
424	198	2	2.30486	2.17269	-1.44105	-1.23448	1	3	0
4	334	3	1.24428	0.364865	-0.523957	0.068913	1	3	0
1408	24	3	0.119352	0.352608	-0.414903	0.21421	1	3	0
53	99	2	1.7394	0.587342	-0.258222	-1.11133	1	2	1
861	564	3	-1.67918	-0.532924	-0.030455	-0.724946	1	2	0
864	564	2	-1.41169	1.60784	-1.11211	-0.47512	1	3	0
1402	24a	2	0.779689	0.915318	-0.838439	-0.461427	1	4	0
761	260b	2	1.57023	0.185083	-0.34709	-0.313117	1	4	0
1165	293	1	0.717733	-1.62345	1.8107	0.198651	1	2	0
469	25	3	0.316717	-0.811008	0.401972	-0.198751	1	2	0
233	99	2	1.82046	0.394097	-0.523226	-0.390428	1	4	0
867	613	3	1.61506	0.02218	-0.450125	-0.663734	1	2	1
726	603a	3	-0.047063	-0.404938	-0.129221	-0.45609	1	3	0
722	56	3	0.546647	0.548801	-0.600257	-0.121051	1	3	0
1224	260A	2	-0.027611	-0.517873	0.03392	-0.144775	1	2	0
619	234b	3	1.43622	0.460478	-0.550956	-0.193608	1	3	0
7	334	2	1.3588	0.95407	-0.869619	-0.249279	1	4	0
75	24a	3	0.279887	0.062087	-0.213341	0.140687	1	2	0
102	24a	1	1.80043	-1.83041	2.67194	0.931583	1	2	1
1160	293	3	0.279588	0.273207	-0.514525	-0.710751	1	3	0
452	25	2	-0.26544	0.204898	-0.570261	-0.627982	1	4	0
470	25	2	0.144332	-1.35265	1.09622	0.023558	1	2	0
17	99	3	1.07894	-0.357385	0.009427	0.7136	1	3	0
78	24a	3	1.08661	1.12603	-0.929888	-0.171189	1	3	0
1405	24a	3	0.238466	-0.798321	0.44533	0.965692	1	2	0
1183	139	1	0.173999	0.082158	-0.032772	0.572804	1	3	0
1150	293	3	1.29482	-0.195662	-0.275852	-0.52498	1	2	0
1398	24	2	-0.268678	0.224096	-0.168775	0.474756	1	3	0
631	345	2	0.730122	-0.544545	-0.032583	-0.51654	1	2	1
67	571	1	0.22509	-0.045422	-0.370173	-0.582614	1	2	0
1264	94	3	-1.04957	1.09917	-0.866332	-0.857514	1	3	0
458	25	1	-0.133836	-1.41738	3.27433	4.93368	1	5	0
471	25	1	0.460042	-0.2972	0.263249	1.0147	1	2	1
653	324	2	0.906732	0.394702	-0.447493	-0.339677	1	3	0
719	56	3	1.17317	1.19873	-0.817321	-0.458605	1	4	0
26	99	1	0.95894	-1.52566	2.97625	3.49088	1	3	0
606	234b	3	0.950708	0.78631	-0.578119	-0.038139	1	3	0
461	25	2	0.290024	-0.615772	0.195953	0.178406	1	5	0
463	25	1	0.141729	-1.38128	1.03382	-0.589553	1	2	0
1395	24	2	-0.466699	-1.57629	1.56249	0.250637	1	2	0
596	262	1	0.427989	1.77191	-0.748047	0.400617	1	5	0
1302	363b	2	-1.25937	-1.73991	2.85459	5.97528	1	2	0
9	334	3	1.75525	1.21885	-0.913958	-0.096812	1	4	0
64	571	2	0.627939	1.35877	-1.13284	-0.965286	1	3	0
1394	24	1	-0.391805	-1.79296	3.0651	1.95578	1	5	0
598	262	3	-0.655149	1.15957	-0.919953	-0.636908	1	4	0
549	63	1	1.36054	-1.67129	2.35174	0.996947	1	5	0
1166	293	1	1.076	-1.48423	1.68034	2.13081	1	2	0
66	571	1	0.342035	-0.028191	-0.416451	-0.539596	1	3	0
462	25	2	0.398275	-0.637888	0.044397	-0.60227	1	2	0
229	99	3	1.87197	-0.611736	0.158439	0.059807	1	2	0
79	24a	3	0.992566	0.139266	-0.424738	0.075891	1	2	0
475	262	1	0.132756	1.38812	-0.612787	0.600376	1	5	0
1221	260A	3	-0.904944	1.03685	-0.708342	-0.022426	1	4	0
1340	262	3	-0.424046	1.1032	-0.903028	-0.538273	1	3	0
655	324	2	1.26502	0.534429	-0.43247	-0.07856	1	3	0
1303	363b	1	-1.39894	-0.766075	1.54668	2.37489	1	4	0
902	80b	3	0.743753	-0.517491	0.035985	0.032056	1	4	0
760	260b	1	1.89279	-0.575901	0.625156	1.22719	1	3	0
857	564	2	-1.18106	-0.375197	0.035268	0.049451	1	2	0
433	24	3	0.009509	0.095277	-0.38774	-0.033485	1	4	0
1154	293	3	0.512231	-0.546792	-0.017723	-0.565437	1	2	0
57	24a	2	0.591585	-0.719509	0.165793	-0.429724	1	3	0
1167	139	2	0.489291	0.217762	-0.382677	-0.000734	1	3	0
1359	22	2	-0.64021	0.178508	-0.505697	-0.441295	1	4	0
643	345	1	1.40317	0.465131	-0.247392	0.960614	1	5	0
481	22	3	-0.526937	1.56561	-1.21659	-0.957594	1	4	0
641	345	2	1.50594	0.103711	-0.179189	-0.012226	1	3	0
474	262	3	0.402879	2.23923	-1.19566	-0.598749	1	2	0
617	234b	3	1.23405	1.06395	-0.908279	-0.81486	1	4	0
1170	293	1	-0.026038	-0.882812	0.741564	1.09874	1	2	0
1335	345	3	1.01268	-0.81508	0.239096	-0.187162	1	2	0
457	25	1	0.041807	-1.78691	3.47423	1.61676	1	5	0
551	63	2	1.56122	0.259425	-0.290951	-0.122097	1	3	0
450	25	1	0.590959	-0.866116	1.14834	1.4824	1	5	0
1153	293	2	1.01248	0.421696	-0.756233	-1.43214	1	2	0
158	571	3	-0.063701	1.10786	-0.854268	-0.276065	1	4	0
862	564	3	-1.66321	0.882212	-0.83519	-0.165369	1	3	0
1341	262	1	0.155629	-0.176169	0.078197	0.833245	1	2	0
468	25	2	0.45372	-0.378091	-0.000307	-0.19133	1	4	0
1379	342-II	2	0.770581	1.84115	-1.07415	-0.372638	1	3	0
1151	293	1	0.748218	-1.24783	0.977316	1.15085	1	2	0
1226	260A	3	-0.090307	-0.955891	0.448906	-0.121544	1	2	0
442	24	3	0.48395	1.72698	-1.06221	-0.214063	1	4	0
426	24	3	0.05142	-0.690238	0.061423	-0.957119	1	2	0
1155	293	3	0.482598	0.416748	-0.408254	-0.176374	1	4	0
454	25	1	-0.267908	-1.62043	2.10631	1.4842	1	5	0
455	25	2	-0.371107	2.1794	-1.3982	-0.834687	1	4	0
58	571	1	0.463242	-1.37377	1.88502	2.47115	1	5	0
534	119a	3	0.767814	-1.37732	1.10573	-0.176567	1	2	1
1295	363b	1	-1.26056	-0.822594	1.25182	2.75091	1	5	0
1261	94	2	-1.45127	1.42106	-1.09598	-0.736911	1	3	0
1156	293	3	0.898019	0.29701	-0.548236	-0.27341	1	2	0
429	24	2	0.156144	1.1001	-0.84947	0.178916	1	3	0
895	456	2	1.41475	1.80265	-1.20534	-0.447564	1	4	0
550	63	2	1.73004	0.956089	-0.729334	-0.042516	1	4	0
5	334	2	1.94143	1.87129	-1.21641	-0.716281	1	4	0
52	99	1	2.02369	0.603066	-0.296001	0.62211	1	5	0
6	334	2	1.60706	2.92448	-1.50489	-0.349844	1	5	0
74	571	3	-0.213622	-0.326535	-0.153147	-0.423157	1	2	0
71	571	3	-0.225275	-0.508257	0.000222	-0.341492	1	2	0
105	571	1	0.835159	-0.986095	2.09745	3.27556	1	5	0
60	571	3	0.204017	0.793565	-0.726816	-0.578529	1	3	0
15	99	2	0.830939	-1.38742	1.08199	-0.429331	1	2	1
548	63	3	1.47495	0.048128	-0.298708	-0.320097	1	2	1
720	56	3	0.669172	0.630909	-0.557567	-0.131719	1	3	0
467	25	3	0.048394	0.236157	-0.437834	-0.125402	1	4	0
594	262	1	-0.128322	2.23411	-1.16472	-0.181138	1	4	0
647	345	2	0.852888	-0.345276	-0.230178	-0.715353	1	4	0
1171	139	3	0.752057	1.82106	-1.06049	-0.566719	1	5	0
723	603a	3	-0.282747	-0.807257	0.281937	-0.381522	1	2	0
1101	1-A-I	3	-0.428968	0.762077	-0.695258	-0.121624	1	4	0
1176	139	3	0.363772	1.33913	-0.854243	-0.285701	1	5	0
56	99	1	1.58289	-0.838032	1.54097	2.10222	1	5	0
24	99	2	1.41342	-0.591761	0.298862	0.002474	1	2	1
1147	293	2	0.913362	0.574824	-0.551422	-0.098821	1	3	0
223	99	2	1.54093	0.834822	-0.751006	0.148918	1	5	0
477	25	2	-0.231756	0.880678	-0.773195	-0.635939	1	3	0
1184	139	3	-0.130752	0.202795	-0.27992	0.003793	1	3	0
1337	262	2	-0.868166	0.738836	-0.673271	-0.615762	1	4	0
1294	363b	1	-1.19495	-0.327344	0.403975	1.40281	1	5	0
866	613	2	1.60368	1.18041	-0.954596	-0.475251	1	3	0
654	324	2	1.54899	1.15487	-0.759935	-0.527529	1	4	0
1180	139	2	0.946252	-1.22862	1.52876	2.00123	1	3	0
650	345	2	1.22872	-0.283855	0.043793	-0.388873	1	4	0
644	345	2	1.23666	0.732899	-0.724398	-0.131971	1	4	0
221	99	3	1.72802	0.711053	-0.66341	0.015181	1	3	0
1070	80b	3	0.965026	-0.152777	-0.343425	-0.732182	1	2	0
901	80b	3	0.651654	-0.182401	-0.019877	0.465272	1	4	0
725	603a	3	0.223964	-0.183905	-0.257013	-0.261254	1	2	0
616	234b	1	0.946633	-0.922448	1.82737	2.23079	1	5	0
1152	293	1	0.687927	-1.4169	1.00011	-1.43115	1	2	0
1099	1-A-I	3	-0.424152	0.684161	-0.681947	-0.208444	1	3	0
420	198	2	1.84015	0.559577	-0.738867	-0.561504	1	3	0
1177	139	3	0.601462	0.472726	-0.597965	-0.040714	1	4	0
892	456	3	0.67536	0.794759	-0.855741	-0.610413	1	2	0
54	99	2	1.56738	-0.565419	-0.105156	-1.47168	1	5	0
428	24	3	0.574812	2.61264	-1.36661	-0.47926	1	5	0
476	262	2	-0.09852	-0.192004	0.054812	0.200674	1	2	0
69	571	1	0.357931	0.677469	-0.717421	-0.284523	1	2	0
1157	293	3	0.810866	-0.084306	-0.277011	-0.111478	1	2	0
618	234b	1	1.15684	0.446447	0.769055	1.13166	1	5	0
1172	293	3	0.111288	-0.25696	-0.335051	-1.28044	1	2	0
1361	260D	3	-0.639714	1.30661	-0.860577	-0.014823	1	3	0
431	24	3	0.323651	2.41106	-1.43656	-0.724032	1	5	0
62	571	2	0.518471	-0.355027	-0.063989	-0.355562	1	2	0
73	571	3	-0.194646	0.136441	-0.516502	-0.629801	1	5	0
1360	22	2	-0.172812	0.305615	-0.399098	-0.661409	1	4	0
894	456	2	1.25127	0.567596	-0.678132	-0.227264	1	3	0
59	571	2	0.020031	1.56636	-0.95855	-0.172259	1	4	0
900	80b	2	0.61606	-1.37327	1.01628	-0.854164	1	2	1
967	436	1	-0.854714	1.5399	-0.822698	-0.109464	2	4	0
1431	528B	2	0.27367	-0.913945	0.711392	-0.743857	2	1	1
343	133	3	0.355271	-0.363897	-0.006276	0.212573	2	1	1
774	182	2	-0.482085	-1.46859	1.18186	-0.567354	2	1	1
945	436	3	-1.15409	1.84993	-1.21296	-0.956353	2	5	0
326	446	3	-0.885829	-0.049976	-0.198381	0.64122	2	1	1
145	528B	1	0.648137	0.417693	-0.12373	0.337911	2	3	0
938	68a	3	-1.14156	1.24574	-0.945138	-0.310191	2	3	0
179	528a	2	-0.358039	0.819823	-0.842166	-0.487805	2	4	0
845	260n	2	0.467413	-0.333979	-0.046045	-0.010873	2	3	0
306	18b	2	0.041148	0.966953	-0.428352	0.213689	2	4	0
329	446	2	-1.06994	1.17229	-1.0335	-0.674682	2	3	0
125	528B	2	0.385505	-0.965507	0.460466	-0.218646	2	2	0
941	436	3	-1.39795	1.50756	-1.21736	-1.22693	2	4	0
1411	528B	1	0.576135	-0.648391	0.49929	1.58879	2	1	1
905	68a	2	-0.47075	-1.7396	2.18748	0.650925	2	5	0
935	68a	3	-0.96778	-0.69533	0.163073	-0.350403	2	1	1
90	528B	3	0.449087	0.878726	-0.612094	-0.085936	2	4	0
907	68a	2	-0.928852	0.45723	-0.230681	0.308361	2	3	0
940	68a	3	-1.66638	-0.500849	-0.025783	-0.178242	2	1	1
779	182	2	-0.064461	1.61488	-1.10186	-0.317872	2	4	0
944	436	3	-1.28015	2.15973	-1.3065	-0.872202	2	4	0
652	18b	2	0.804525	0.569151	-0.705911	-1.311	2	3	0
171	528a	2	-0.620002	-0.68421	0.085501	-0.631937	2	3	0
341	446	3	-1.78091	-0.389024	-0.148941	-0.729385	2	1	1
150	528B	2	-0.116173	0.757809	-0.661056	-0.473471	2	3	0
602	18b	1	-0.163632	-1.50018	2.04741	1.41336	2	5	0
173	528a	3	-0.825726	0.030343	-0.439685	-0.476035	2	2	0
162	528a	2	-0.279696	-0.142199	-0.04782	0.412669	2	4	0
706	250	2	0.776653	0.829111	-0.726438	-0.257051	2	3	0
86	528B	3	0.42274	1.78373	-1.20652	-0.911809	2	4	0
347	133	2	0.134685	-0.660678	-0.014776	-1.39846	2	1	1
777	182	3	-0.649659	-1.36051	1.04949	-0.233177	2	1	1
308	18b	1	0.236277	-1.46179	2.81851	4.066	2	5	0
109	528B	3	0.10983	-1.18864	0.88467	0.304916	2	1	1
129	528B	1	0.468631	-1.75158	2.14471	0.027391	2	1	1
312	18b	1	0.619168	-1.44398	2.507	2.87392	2	5	0
1352	182	2	-0.602845	-1.06986	0.50162	-0.714644	2	2	0
1428	528B	3	0.506866	0.638519	-0.54296	-0.014907	2	4	0
780	182	3	-0.169059	1.39408	-1.07947	-0.550819	2	5	0
815	260n	2	0.273353	-0.382834	-0.022647	0.200484	2	4	0
765	182	3	-0.120547	1.40163	-0.970551	-0.175903	2	4	0
783	182	1	-0.199304	2.5277	-0.95185	-0.0551	2	5	0
827	260n	2	0.285737	-0.318158	-0.149017	-0.003061	2	3	0
961	436	3	-0.663617	0.245948	-0.380096	-0.302175	2	1	1
322	446	2	-0.930204	0.964399	-0.975223	-0.976335	2	3	0
126	528B	3	0.270644	-1.06822	0.491848	-0.733772	2	1	1
839	260n	1	-0.123708	-0.774247	1.3647	3.31552	2	5	0
122	528B	3	0.410202	0.309246	-0.253034	0.529678	2	3	0
818	260n	2	0.44775	-0.308576	-0.175688	-0.214625	2	3	0
923	68a	3	-2.06145	-0.882427	0.381244	0.054213	2	1	1
174	528a	3	-0.40521	0.734096	-0.606692	-0.112625	2	3	0
316	446	1	0.354924	-1.79268	2.50522	0.352509	2	5	0
324	446	3	-1.27811	0.723105	-0.884617	-1.11055	2	2	0
317	446	2	-0.523554	-0.217492	-0.145893	-0.41057	2	1	1
960	436	3	-0.848247	0.691001	-0.566219	-0.316912	2	2	0
939	68a	3	-1.23496	-0.418515	-0.113202	-0.526821	2	1	1
1351	182	3	-0.130525	1.51403	-1.07298	-0.486985	2	3	0
147	528B	2	0.62511	1.40034	-1.03325	-0.338047	2	4	0
361	133	3	-0.216754	0.615073	-0.454621	0.139899	2	3	0
714	250	2	1.15172	-0.448604	-0.140164	-0.771244	2	1	1
694	250	1	0.59604	-0.845979	0.907765	2.17173	2	5	0
1346	182	3	-0.570484	-1.31439	1.00998	0.213214	2	1	1
953	436	2	-0.701237	2.41283	-1.44688	-0.876202	2	3	0
349	133	2	-0.052423	-1.12492	0.68331	0.074164	2	1	1
956	436	1	-0.496846	-1.08867	0.916945	1.52154	2	1	1
813	260n	1	0.294985	-0.883891	0.939739	1.19593	2	3	0
788	182	1	-0.258767	1.16302	-0.735039	-0.192413	2	2	0
798	182	3	-0.55158	-0.215525	-0.153525	0.045109	2	1	1
149	528B	2	0.02273	0.890718	-0.853777	-0.867003	2	3	0
115	528B	2	0.407238	-0.949135	0.601229	-0.250948	2	3	0
926	68a	3	-2.01989	0.166179	-0.409034	-0.012846	2	1	1
309	18b	2	0.130062	-0.055372	0.209843	-0.460289	2	5	0
175	528a	3	-0.374177	0.346172	-0.530279	-0.516949	2	2	0
697	250	2	0.274628	0.024535	-0.360388	-0.857755	2	1	1
797	182	3	-0.569012	-1.44248	1.15278	-0.390513	2	1	1
1344	182	3	-0.43784	0.864722	-0.615079	0.288087	2	3	0
325	446	2	-0.799153	0.885091	-0.763209	-0.274369	2	3	0
968	436	3	-0.527918	0.810222	-0.618189	-0.092784	2	3	0
166	528a	2	-0.491482	-1.01833	0.462128	-0.636969	2	3	0
167	528a	2	-0.454622	-1.19665	0.806204	-0.147904	2	1	1
962	436	1	-0.483418	1.93526	-1.31075	-0.794783	2	3	0
772	182	2	-0.186804	-1.07764	0.562834	-0.374232	2	1	1
327	446	3	-1.0958	0.143028	-0.418	-0.211786	2	1	1
805	182	2	-0.382428	-0.437831	-0.081771	-0.213841	2	1	1
817	260n	2	0.532126	-0.490075	-0.022735	-0.382251	2	3	0
1353	182	3	-0.656328	-0.813718	0.268148	-0.50619	2	1	1
824	260n	3	0.702616	-0.965107	0.409906	-0.446378	2	1	1
334	446	2	-0.973665	3.62207	-1.46631	-0.855773	2	2	0
144	528B	1	0.43472	-0.610839	0.401494	0.872922	2	4	0
764	182	2	-0.106984	0.561668	-0.599388	0.176317	2	5	0
830	260n	3	-0.010786	-0.365554	-0.181922	-0.693499	2	5	0
971	436	3	-0.461858	0.456739	-0.596328	-0.203731	2	2	0
159	528a	2	-0.134759	1.59256	-1.16541	-0.481197	2	3	0
775	182	2	-0.401418	-0.815068	0.229677	-0.633184	2	2	0
92	528B	3	0.211412	0.377034	-0.551825	-0.325888	2	2	0
339	446	3	-1.72608	0.750253	-0.849835	-0.763841	2	3	0
1432	528B	3	0.460625	-0.685672	0.115396	-0.469405	2	2	0
141	528B	2	0.386804	-0.408027	-0.029032	-0.354924	2	3	0
716	250	3	0.464517	-0.328057	-0.126211	0.17709	2	1	1
293	18b	3	0.604412	-0.480682	0.063589	0.185347	2	1	1
627	18b	2	0.443131	-0.505048	0.09827	-0.277748	2	1	1
773	182	3	-0.389351	-1.19542	0.803345	0.124898	2	1	1
117	528B	1	0.446826	-1.33485	1.07013	0.298383	2	1	1
771	182	2	-0.287308	-0.105324	-0.145276	0.604782	2	3	0
114	528B	2	0.141705	-0.928042	0.945594	-0.635908	2	1	1
795	182	2	-0.380436	-0.526818	-0.098658	-1.00153	2	1	1
914	68a	3	-1.20545	0.945441	-0.775084	-0.489976	2	5	0
811	260n	2	-0.044109	-0.528159	-0.018705	-0.445186	2	3	0
123	528B	3	0.559098	-0.564914	0.580036	-0.065476	2	4	0
353	133	1	1.66347	-1.5488	3.50694	5.35147	2	5	0
328	446	2	-0.910651	1.16489	-1.0872	-1.24999	2	4	0
160	528a	2	0.1667	1.14227	-0.72572	-0.247909	2	1	1
165	528a	2	-0.461762	-0.981291	0.441879	-0.531778	2	3	0
107	528B	1	0.232327	-1.56584	2.55362	0.397211	2	5	0
822	260n	3	0.510672	0.45544	-0.582463	-0.015369	2	4	0
93	528B	1	0.525116	-0.240724	0.362871	1.21413	2	3	0
131	528B	3	0.407224	0.858589	-0.504853	0.107123	2	3	0
828	260n	2	0.827542	1.13773	-0.970513	-0.52267	2	5	0
766	182	3	-0.188651	0.880272	-0.835228	-0.322529	2	3	0
696	250	2	0.890374	-0.386858	-0.019197	-0.314032	2	1	1
1429	528B	1	0.478446	-0.898978	0.677114	1.53707	2	1	1
707	250	3	0.331868	-0.431069	-0.098469	-0.455341	2	1	1
782	182	2	-0.256429	1.51433	-0.813933	0.098178	2	5	0
342	133	3	0.499385	0.486636	-0.512976	-0.817523	2	1	1
321	446	2	-0.779604	1.21455	-1.05682	-0.860771	2	2	0
164	528a	3	-0.260701	-0.014039	-0.285599	-0.155538	2	5	0
318	446	2	-0.937305	1.34084	-0.900811	-0.498021	2	5	0
142	528B	2	0.616387	1.04398	-0.981708	-0.773258	2	3	0
928	68a	3	-1.87231	-0.365961	-0.098922	0.001693	2	1	1
138	528B	2	0.08113	-0.71334	0.099781	-0.817008	2	5	0
776	182	3	-0.475205	-1.05044	0.522008	-0.58562	2	2	0
177	528a	3	-0.161159	0.999854	-0.593633	-0.149537	2	4	0
952	436	3	-1.0853	0.959403	-0.721161	-0.776688	2	2	0
1350	182	3	-0.510559	1.53015	-1.01713	-0.27515	2	3	0
169	528a	3	-0.476235	0.595018	-0.611956	0.11583	2	3	0
1347	182	2	-0.705192	-1.30888	0.976283	-0.022657	2	1	1
1412	528a	3	-0.597365	-1.03956	0.635318	0.481465	2	1	1
965	436	2	-0.639373	0.352004	-0.577993	-0.933858	2	3	0
330	446	2	-1.24079	1.06296	-0.908279	-0.15392	2	5	0
931	68a	3	-1.40614	0.783044	-0.738187	-0.354258	2	1	1
170	528a	3	-0.4576	-0.7543	0.178247	-0.378927	2	1	1
359	133	1	-0.514297	-0.750802	1.14394	2.53622	2	5	0
352	133	2	-0.533894	0.668001	-0.625279	-0.429014	2	4	0
692	250	2	1.35558	-0.214262	-0.313001	-0.809045	2	1	1
918	68a	3	-2.03253	-0.387006	0.009906	-0.152839	2	1	1
700	250	2	0.976275	0.344851	-0.367667	-0.273696	2	5	0
348	133	2	0.117182	-0.782542	0.145544	-0.900914	2	1	1
360	133	2	-0.673456	0.464659	-0.446083	0.15179	2	3	0
955	436	2	-0.747253	0.293307	-0.576192	-0.421116	2	1	1
112	528B	2	0.148787	0.208297	-0.117194	0.693243	2	4	0
927	68a	3	-1.84081	-1.14922	0.734449	-0.285262	2	1	1
354	133	3	-0.700328	-0.647979	0.176547	0.103895	2	1	1
920	68a	3	-1.41619	-0.289443	-0.152971	-0.144854	2	1	1
100	528B	3	0.550428	-0.94568	0.374003	-0.505703	2	3	0
806	182	3	-0.465866	-0.891471	0.347458	-0.311972	2	1	1
1396	528B	1	-0.103279	-1.76367	2.70877	3.4498	2	5	0
134	528B	2	0.198691	-0.348404	-0.069543	-0.248874	2	1	1
969	436	1	-0.724947	0.028999	0.203685	1.193	2	5	0
957	436	2	-0.617135	3.54552	-1.84326	-1.69222	2	2	0
810	260n	2	0.216387	-0.781655	0.488095	0.185797	2	4	0
702	250	3	0.328982	-0.700518	0.194593	-0.155299	2	1	1
120	528B	2	0.264779	0.161358	-0.54364	-0.645467	2	2	0
825	260n	3	0.517514	-0.653459	0.087893	-0.520644	2	2	0
951	436	2	-0.931142	1.59337	-1.0269	-0.796633	2	3	0
840	260n	3	0.221097	-1.11202	0.606821	-0.336981	2	1	1
922	68a	2	-1.40924	0.727455	-0.475651	0.156624	2	5	0
838	260n	1	0.160642	-1.60322	2.57443	3.8235	2	5	0
155	528a	1	0.09439	-1.49049	1.99336	2.54454	2	5	0
332	446	2	-1.01592	2.17194	-1.23418	-0.521471	2	5	0
338	446	3	-1.54985	-0.324102	-0.193318	-0.707637	2	1	1
819	260n	2	0.228877	-1.1141	0.653099	-0.252149	2	1	1
708	250	3	0.276062	-1.14806	0.592389	-0.993058	2	1	1
908	68a	3	-1.32964	-0.468215	-0.175487	-1.28064	2	1	1
1430	528B	1	0.466644	-0.047615	0.109742	1.34472	2	5	0
856	260n	3	0.645804	0.428707	-0.587727	-0.07125	2	3	0
809	260n	2	0.154104	-0.42968	-0.099841	-0.447948	2	5	0
709	250	3	1.13324	-0.853706	0.255139	-0.853459	2	1	1
906	68a	1	-0.859617	-1.33366	1.46924	1.51024	2	4	0
934	68a	3	-0.757121	-0.072669	-0.385045	-0.65905	2	1	1
812	260n	2	-0.022063	-0.29449	-0.167415	-0.232659	2	4	0
807	260n	3	-0.176228	-0.777601	0.23256	-0.118342	2	5	0
346	133	3	0.208996	0.400299	-0.492915	-0.43514	2	4	0
793	182	3	-0.387576	-0.792513	0.244637	-0.393574	2	1	1
933	68a	2	-0.997991	1.97665	-1.06014	-0.799232	2	1	1
651	18b	1	0.584233	-1.32166	1.75587	2.52809	2	5	0
936	68a	3	-0.536107	-0.467355	-0.013404	-0.222668	2	1	1
925	68a	3	-1.49292	-0.408749	-0.028402	-0.099293	2	1	1
932	68a	3	-0.649096	1.2214	-0.942569	-0.656939	2	4	0
154	528B	1	0.53266	-1.7931	2.47159	1.14798	2	5	0
916	68a	1	-1.90491	0.140601	-0.328742	0.143971	2	1	1
781	182	2	-0.072063	2.29788	-1.3534	-0.233136	2	5	0
789	182	2	-0.704874	1.95145	-1.20484	-0.529604	2	5	0
964	436	2	-0.680871	-1.86603	2.85469	0.153874	2	5	0
119	528B	3	0.089627	-0.714342	0.206455	-0.082413	2	2	0
823	260n	3	0.251303	-0.782413	0.249183	-0.314338	2	3	0
791	182	1	-0.234749	-0.439347	0.404529	1.70358	2	4	0
116	528B	1	0.491307	-0.730863	0.583108	1.57636	2	5	0
847	260n	2	1.34522	0.74296	-0.728516	-0.175161	2	3	0
949	436	3	-1.173	1.30147	-1.08598	-0.808521	2	3	0
157	528a	1	-0.229509	-1.21107	1.18525	2.1367	2	1	1
601	18b	1	-0.30726	-1.24348	1.45982	2.38733	2	5	0
113	528B	3	0.226086	-1.05356	1.78937	-1.3728	2	2	0
336	446	3	-1.50025	0.925722	-0.872616	-0.40733	2	2	0
792	182	2	-0.232064	-0.929778	0.348843	-0.649356	2	3	0
770	182	2	-0.335748	-1.30637	1.02372	-0.050746	2	2	0
344	133	2	0.135421	0.318112	-0.293973	0.151426	2	3	0
96	528B	3	0.3743	0.826304	-0.688987	-0.602603	2	2	0
362	133	3	-0.10491	0.883319	-0.731966	-0.381168	2	4	0
333	446	2	-1.25149	2.05305	-1.27419	-0.417006	2	3	0
1397	528B	2	-0.354946	-1.23544	1.09682	1.20513	2	2	0
351	133	1	0.057502	-1.39371	1.38407	1.25342	2	1	1
767	182	3	-0.317234	-1.26768	0.848365	-0.396673	2	1	1
345	133	3	0.046147	-0.502214	-0.100609	-0.821434	2	4	0
950	436	2	-1.01132	1.11436	-0.846246	-1.20658	2	5	0
1427	528B	1	0.655821	-1.63483	3.07851	3.79298	2	5	0
310	18b	1	0.355757	1.10889	-0.645478	-0.274796	2	4	0
917	68a	1	-1.91425	-0.333946	-0.097172	-0.062449	2	1	1
943	436	3	-1.21627	1.65187	-1.06394	-0.399409	2	3	0
323	446	2	-1.26366	1.62128	-1.06132	-0.293348	2	3	0
710	250	1	0.931448	-0.546314	1.73434	2.56045	2	5	0
178	528a	3	-0.482725	-0.706624	0.173349	-0.088302	2	2	0
800	182	3	-0.767542	-1.22681	0.732661	-0.860703	2	1	1
803	182	2	-0.566269	-1.14168	0.649838	-0.304349	2	1	1
320	446	2	0.58022	0.974511	-0.902197	-0.591613	2	3	0
778	182	3	-0.302136	-0.727053	0.145115	-0.475409	2	2	0
954	436	3	-0.872015	1.05195	-0.48604	-0.442552	2	2	0
808	260n	2	0.101391	-0.012848	-0.260602	0.069662	2	4	0
1399	528B	1	0.132588	-1.20939	1.06612	1.00176	2	1	1
121	528B	2	0.159555	-1.02298	0.892616	-0.232044	2	1	1
163	528a	3	-0.291782	1.29031	-0.803708	0.255737	2	3	0
924	68a	3	-1.74286	0.76867	-0.768498	-0.342772	2	3	0
801	182	3	-0.600343	-1.12357	0.569017	-0.789068	2	1	1
816	260n	1	0.74727	-1.11753	1.32896	2.13143	2	5	0
701	250	2	0.652015	0.429772	-0.49211	-0.198742	2	3	0
804	182	3	-0.40903	-1.06415	0.458212	-1.09668	2	1	1
699	250	2	0.805867	-0.314672	-0.234081	-0.673899	2	1	1
787	182	2	-0.547601	1.66273	-0.988017	-0.595146	2	2	0
124	528B	3	0.261714	-0.656602	0.094794	-0.597782	2	3	0
958	436	1	-0.504097	0.82286	-0.750528	-0.110351	2	2	0
91	528B	1	0.806262	-1.87343	3.90916	1.09849	2	5	0
151	528B	2	0.063121	0.135088	-0.27764	-0.323409	2	4	0
1348	182	2	-0.622037	-0.401368	-0.042065	-0.122815	2	3	0
831	260n	2	-0.012917	-0.028377	-0.391807	-0.55385	2	5	0
959	436	2	-0.727945	1.87995	-1.20893	-0.637926	2	3	0
947	436	3	-1.13687	0.804874	-0.837331	-0.452083	2	2	0
83	528B	3	0.154821	-0.204408	-0.130782	0.380797	2	1	1
88	528B	2	0.439772	0.828482	-0.769317	-0.881056	2	1	1
85	528B	3	0.311083	0.340292	-0.544143	-0.354201	2	2	0
311	18b	2	0.667782	0.67767	-0.524574	-0.570163	2	5	0
152	528B	1	0.655984	-0.448252	0.026969	-0.248736	2	4	0
930	68a	3	-1.66174	0.666202	-0.702511	-0.266516	2	3	0
350	133	2	0.224614	0.939041	-0.497524	-0.17679	2	4	0
319	446	1	0.535677	1.68824	-1.09826	-0.581639	2	4	0
911	68a	2	-1.09974	1.90359	-0.606919	-1.55037	2	1	1
153	528B	1	0.514242	-1.08685	1.34775	1.99403	2	4	0
942	436	3	-1.37135	0.434202	-0.488558	0.279481	2	2	0
1345	182	3	-0.434328	0.337515	-0.296227	0.685486	2	5	0
99	528B	2	-0.111203	-1.87042	3.90769	1.6117	2	5	0
127	528B	2	0.439161	0.267612	-0.386632	-0.045181	2	4	0
799	182	2	-0.665628	-1.20342	0.821277	-0.228954	2	2	0
1349	182	2	-0.522424	1.63247	-0.951334	-0.189629	2	5	0
915	68a	2	-1.63016	1.05008	-0.667125	-0.382613	2	4	0
794	182	2	-0.519479	-0.732081	0.189656	-0.259629	2	3	0
176	528a	3	-0.413577	0.38653	-0.61596	-0.413099	2	3	0
1409	528B	3	0.475251	0.93261	-0.644408	0.086814	2	3	0
307	18b	1	0.522171	-0.029454	0.358779	1.30838	2	5	0
912	68a	2	-0.859809	-0.093405	-0.308102	-0.631038	2	1	1
87	528B	2	0.06036	0.656123	-0.834334	-0.952435	2	3	0
937	68a	3	-0.79387	2.2007	-1.26424	-0.769965	2	1	1
84	528B	2	0.044824	-0.381865	-0.092009	-0.409752	2	2	0
600	18b	3	0.096137	-0.520261	0.179179	0.300333	2	3	0
913	68a	3	-1.15082	0.186593	-0.413933	-0.533952	2	1	1
1343	182	3	-0.011964	2.01163	-1.22673	-0.295667	2	3	0
826	260n	2	0.439517	0.131277	-0.444445	-0.232948	2	4	0
82	528B	3	-0.206049	-1.7064	1.99297	0.005265	2	1	1
128	528B	1	0.468924	-1.55973	1.81366	2.10744	2	1	1
693	250	2	0.421379	-0.796874	0.629891	-0.235008	2	1	1
909	68a	3	-1.18446	-0.218202	-0.251359	-0.560642	2	1	1
335	446	3	-1.63717	0.084684	-0.457366	-0.579538	2	1	1
802	182	3	-0.286543	-0.92264	0.332246	-0.569904	2	4	0
94	528B	1	0.295244	0.3715	0.340494	0.674365	2	5	0
118	528B	3	0.238451	0.050534	-0.160413	-0.646991	2	3	0
337	446	3	-1.35243	1.76358	-1.2093	-0.48348	2	4	0
970	436	3	-0.68332	-0.597349	0.049384	-0.457873	2	2	0
910	68a	3	-1.14313	0.715252	-0.799351	-0.62329	2	1	1
340	446	3	-1.63874	0.093452	-0.532659	-0.912191	2	1	1
711	250	3	1.20142	0.714434	-0.448097	-0.501116	2	1	1
695	250	2	1.11187	0.22831	-0.463511	-0.305415	2	3	0
946	436	3	-1.11591	0.941173	-0.810092	-0.459066	2	1	1
929	68a	3	-1.97983	-0.568072	-0.077325	-1.07015	2	1	1
146	528B	3	0.772424	0.800781	-0.519499	-0.49096	2	2	0
89	528B	1	1.8102	-0.344218	0.005032	-0.179719	2	2	0
130	528B	3	0.344522	-0.378719	0.150329	0.312971	2	1	1
966	436	3	-1.07234	0.398491	-0.487211	-0.435419	2	2	0
821	260n	2	0.163269	-1.16575	0.630029	-0.884354	2	3	0
790	182	1	-0.164234	-0.906477	1.72458	1.48751	2	5	0
832	260n	2	0.047331	-0.935844	0.464786	0.012174	2	1	1
148	528B	2	0.365153	0.287761	-0.508556	-0.360723	2	2	0
161	528a	2	0.010447	1.82903	-1.0755	-0.341412	2	3	0
132	528B	3	0.640155	0.331602	-0.312145	-0.203321	2	1	1
110	528B	3	-0.149064	-0.528547	0.016492	-0.124802	2	3	0
919	68a	3	-2.06863	0.024719	-0.365148	-0.997742	2	3	0
963	436	1	-0.588498	-1.47971	2.27126	4.71975	2	5	0
829	260n	3	1.01262	0.146247	-0.421199	-0.11731	2	3	0
1	528B	1	0.637773	-1.60521	1.68847	-0.096915	2	3	0
603	18b	2	0.097941	0.625429	-0.582929	-0.232863	2	4	0
796	182	2	-0.473988	-1.41248	1.00178	-1.25729	2	1	1
784	182	3	-0.548588	1.04671	-0.969631	-0.63881	2	5	0
111	528B	3	-0.067276	-0.309674	-0.22815	-0.645253	2	1	1
95	528B	1	0.236541	-0.132989	2.1111	2.91942	2	5	0
331	446	3	-1.39208	1.93238	-1.28743	-0.515403	2	4	0
750	94a	1	1.85209	-0.028043	0.194051	1.06401	3	5	0
1274	12	3	-2.44839	0.074864	-0.378723	-0.009873	3	1	1
987	230	3	-1.6262	-0.584052	0.28637	0.580984	3	3	0
584	103	1	-0.954544	-1.07803	1.01289	2.18671	3	5	0
527	260r	3	1.11381	0.568261	-0.351535	0.446791	3	3	0
740	94a	1	1.69307	1.23768	-0.297272	0.623429	3	5	0
1356	357	3	-1.19055	-0.633169	0.208407	0.364764	3	1	1
32	560	2	1.23769	0.311922	-0.57521	-0.314214	3	3	0
214	480	2	0.025352	1.70075	-1.18901	-0.819737	3	1	1
1374	142	3	-1.38807	-0.416036	-0.113467	-0.371968	3	3	0
589	103	1	0.361218	0.816499	-0.533918	0.011972	3	3	0
975	230	2	-1.88856	0.152046	-0.355389	0.112336	3	4	0
259	332	2	0.158554	3.45189	-1.59304	-0.650802	3	5	0
291	289	3	0.492476	1.29004	-1.07502	-0.725187	3	3	0
561	35	1	1.18345	-1.08137	2.05012	2.16195	3	5	0
1322	422	3	0.368641	0.943733	-0.851397	-0.437812	3	4	0
211	480	3	-0.031349	-0.29998	-0.140202	-0.388085	3	1	1
1369	142	3	-1.39942	1.43104	-0.98973	-0.491187	3	3	0
604	80a	1	0.81739	-1.52083	1.76702	1.96642	3	5	0
587	103	2	-1.15362	-0.099104	-0.40445	-0.707869	3	3	0
531	260r	3	1.46799	-0.933579	0.28671	-1.11369	3	2	0
1417	332	2	-0.132758	1.32529	-0.903154	-0.362268	3	3	0
1134	342	2	-0.451206	1.67539	-1.20936	-0.775341	3	3	0
680	55	3	-1.55267	-0.336764	-0.080826	0.000558	3	1	1
413	230	2	-1.06295	2.32522	-1.30184	-0.459308	3	4	0
417	357	1	-0.659585	1.15623	-0.651913	0.30722	3	5	0
1391	342	3	0.81753	0.371945	-0.673057	-0.887894	3	2	0
1114	1a	1	-0.247196	-0.854289	0.332283	-0.151698	3	1	1
1008	230	3	-0.722311	1.03778	-0.938237	-0.459694	3	1	1
1014	230	2	-0.371444	0.845112	-0.845214	-1.03255	3	3	0
874	255	1	0.689827	1.79038	-0.868057	0.240943	3	5	0
983	230	3	-1.35631	-0.954928	0.44975	-0.432203	3	1	1
888	241	2	0.537866	0.305778	-0.617774	-0.663976	3	3	0
484	332	2	-0.445413	-1.72094	2.54712	3.81288	3	5	0
483	365A	2	-0.773325	1.88242	-1.0956	-0.221636	3	5	0
1291	12	2	-0.80712	1.03294	-0.116477	0.655351	3	5	0
1371	142	2	-1.22958	1.31831	-0.823882	-0.052056	3	3	0
521	332	2	0.242748	0.672001	-0.707032	-0.644454	3	3	0
1214	233	3	-1.62977	-0.033818	-0.229762	0.135285	3	1	1
1368	55	2	-1.10848	0.646859	-0.706957	-0.264528	3	1	1
1358	357	3	-0.625098	-0.948853	0.461524	-0.087192	3	1	1
991	230	3	-1.36527	0.327659	-0.311968	-0.655617	3	3	0
683	357	3	-1.12914	-0.85031	0.524652	0.786453	3	2	0
247	332	3	0.077132	1.16239	-0.732168	-0.199274	3	4	0
45	560	3	1.73596	0.93889	-0.943552	-0.870295	3	2	0
1355	260	2	-1.09401	-0.427018	0.195865	0.324017	3	3	0
1072	486	2	0.798607	-0.307042	-0.068775	-0.426192	3	3	0
1310	21	1	-1.63352	-1.40683	1.56504	2.29541	3	5	0
1190	260	2	-1.54997	-0.815775	0.379746	-0.137363	3	1	1
1426	480	1	0.644774	-1.67805	2.34362	1.76745	3	5	0
586	103	3	-0.521365	0.926986	-0.38162	-1.11876	3	3	0
1268	243	2	-1.41701	0.583372	-0.67929	-0.160378	3	1	1
507	167	2	-0.357346	0.675893	-0.726249	-0.330275	3	4	0
1193	260	3	-1.42021	0.807358	-0.868133	-0.736586	3	4	0
1319	422	3	-0.127239	-1.21016	0.920169	0.463918	3	1	1
285	332	1	0.278299	-0.428314	0.861738	2.06517	3	5	0
1024	230	1	-0.001702	-1.42233	1.53437	2.81283	3	5	0
882	174	2	1.04152	-0.129792	-0.214059	-0.448345	3	1	1
270	332	3	-0.176199	0.536655	-0.530996	0.178889	3	3	0
1140	342	3	0.598503	-0.837813	0.297552	-0.266099	3	1	1
1292	12	2	-0.571263	0.333936	-0.487186	-0.550869	3	5	0
1197	260	2	-1.37954	-0.476616	0.105423	0.091783	3	3	0
220	480	1	0.167215	-1.64957	2.38851	3.33266	3	5	0
382	174	2	1.14331	0.293584	-0.271444	-0.126365	3	3	0
1187	260	1	-1.25835	-1.39416	1.67669	2.33441	3	1	1
1045	142	3	-0.830417	2.5379	-1.33445	-0.361093	3	4	0
1017	230	2	-0.867844	0.347303	-0.414172	-0.265812	3	4	0
1036	142	2	-0.924753	-1.8549	2.79584	0.139275	3	1	1
675	55	2	-1.14705	-0.58293	0.133467	-0.815993	3	1	1
556	35	3	0.570958	-0.08495	-0.402927	-1.11732	3	1	1
266	332	3	-0.062459	1.09884	-0.948412	-0.63536	3	3	0
843	80	3	0.651053	-0.62804	0.16782	-0.079897	3	1	1
1413	480	2	0.092288	0.461137	-0.508329	0.100674	3	3	0
1278	12	3	-1.96841	-0.336415	-0.020317	0.057996	3	1	1
746	94a	3	1.74728	0.62566	-0.787425	-0.715358	3	3	0
252	332	1	0.355247	-0.762562	0.126062	-1.02841	3	3	0
1129	260	3	-1.08744	-1.0745	0.629828	0.082385	3	1	1
405	260r	2	0.775585	-1.16892	0.732875	-0.082553	3	1	1
251	332	2	0.103387	0.767551	-0.584403	-0.004367	3	4	0
1038	142	2	-0.906917	-1.58693	1.78783	0.795215	3	5	0
1281	12	2	-1.46701	2.09167	-1.02826	-1.28871	3	1	1
488	167	2	0.365947	1.22168	-0.930782	-0.574605	3	1	1
853	10	3	0.847784	-0.191478	-0.262907	-0.38053	3	1	1
1308	21	1	-1.61022	-0.415306	0.258615	1.05466	3	2	0
50	560	3	1.45767	1.61229	-1.18907	-0.691694	3	3	0
1216	233	3	-1.40016	0.348088	-0.393004	-0.323542	3	3	0
565	35	3	0.642152	0.528847	-0.54238	0.173327	3	3	0
1050	142	1	-1.07996	-0.616668	0.139449	-0.198334	3	1	1
1104	1a	2	-0.914783	0.828073	-0.813303	-0.15581	3	3	0
305	288	1	-0.495711	-1.33895	1.72154	3.75536	3	5	0
1271	12	3	-2.37454	-1.11721	0.597943	-0.481822	3	1	1
585	103	2	-0.345116	0.14954	-0.277199	-0.637156	3	4	0
730	603	3	1.03239	-0.832739	0.331301	0.072247	3	1	1
265	332	3	-0.087753	0.046669	-0.446725	-0.601005	3	2	0
662	174	2	1.33242	0.051145	-0.455376	-0.678931	3	1	1
1031	230	3	-1.06829	-0.236318	0.067997	-0.082267	3	1	1
1135	342	3	-0.261615	-0.498566	-0.062327	-0.602002	3	1	1
553	35	3	0.69791	1.3693	-1.08235	-1.14709	3	1	1
993	230	1	-0.765728	0.630142	-0.458889	0.468773	3	5	0
36	560	2	1.051	-0.944645	0.415749	-0.011638	3	2	0
1265	243	3	-1.51034	1.05772	-0.749445	0.239733	3	3	0
496	167	3	-0.064475	-0.808514	0.384078	0.028494	3	1	1
872	255	3	0.388406	0.39456	-0.575739	-0.044954	3	3	0
1392	230	2	-0.96663	0.876985	-0.721149	-0.256141	3	3	0
1362	365A	2	-0.477972	-0.411717	-0.003292	-0.165138	3	2	0
1039	142	2	-0.573789	-1.58562	2.39896	1.75685	3	5	0
29	560	2	1.68979	0.21208	-0.605294	-1.0204	3	1	1
752	396	2	1.11575	-0.56255	0.016995	-0.32598	3	1	1
736	603	2	1.30883	-0.873253	0.264622	-0.664212	3	2	0
581	103	3	-1.81122	0.164417	-0.52737	-0.487973	3	1	1
1189	260	3	-1.04005	0.532508	-0.521526	0.141835	3	3	0
611	80a	2	0.572772	-0.076011	-0.238602	-0.68838	3	2	0
666	55	2	-1.28022	0.969293	-0.798822	-0.052222	3	3	0
580	103	3	-1.79576	0.763984	-0.696731	0.240248	3	3	0
1422	480	2	0.792785	0.45184	-0.581204	-0.81183	3	4	0
301	288	3	-0.435324	-0.531522	0.060189	0.352406	3	1	1
1026	230	2	-0.474618	1.16742	-0.863952	-0.143326	3	3	0
990	230	2	-1.27815	0.752969	-0.849533	-0.761973	3	1	1
1421	480	1	0.913814	1.08154	-0.457114	0.387426	3	3	0
1200	260	2	-1.71667	-0.546097	0.036388	-0.229872	3	5	0
998	230	1	-0.739314	-0.626729	0.881207	2.27992	3	4	0
485	167	1	-0.232564	0.427709	-0.411981	0.28979	3	3	0
401	260r	3	0.869863	-1.20569	0.734689	-0.592602	3	1	1
295	289	3	0.978806	0.121959	-0.471004	-0.420655	3	3	0
1416	332	3	-0.403324	-0.290316	0.117386	1.22372	3	1	1
1259	260	3	-1.30127	-0.181844	-0.168598	0.1046	3	3	0
302	288	3	-0.383044	-0.584888	0.001128	-0.642493	3	1	1
1013	230	3	-0.382447	0.235423	-0.336373	-0.581629	3	1	1
509	332	3	-0.299562	-0.774118	0.23324	-0.410927	3	1	1
505	332	2	-0.145806	-0.296097	-0.227886	-0.611032	3	4	0
1202	260	2	-1.36883	0.138941	-0.137544	0.355294	3	4	0
189	480	3	-0.120922	0.041571	-0.356623	-0.167581	3	1	1
370	260c	3	1.00929	-1.06608	0.56981	-0.162632	3	3	0
218	480	2	0.81422	1.23136	-0.835958	-0.630932	3	4	0
39	560	2	1.00321	-0.999948	0.499844	-0.327809	3	3	0
738	603	2	1.27175	-1.03632	0.491357	-0.448116	3	2	0
992	230	3	-0.850696	1.58766	-1.11194	-0.794135	3	4	0
304	288	3	-0.351674	0.951601	-0.705408	-0.255566	3	3	0
200	480	3	-0.449936	-1.24261	0.905637	0.247768	3	4	0
745	94a	3	1.78254	-0.524348	0.096796	0.098998	3	1	1
1423	480	1	1.22471	-0.67722	0.181824	-0.101714	3	1	1
1108	1a	2	0.130167	0.523839	-0.503657	-0.236861	3	4	0
234	480	3	-0.342234	-0.378885	-0.04845	0.195618	3	1	1
1115	1a	1	-0.236563	0.424584	-0.645793	-0.645221	3	1	1
1290	12	2	-1.77491	-0.194826	-0.320078	-0.500303	3	5	0
292	289	2	0.983382	2.6038	-1.4163	-0.651503	3	5	0
554	35	2	0.54618	-1.07413	0.600927	0.214403	3	1	1
198	332	2	-0.369399	-0.540166	-0.112208	-1.25817	3	2	0
1364	365A	2	-0.613738	0.956239	-0.675462	-0.655155	3	4	0
664	174	2	1.47514	0.288531	-0.519373	-0.267645	3	3	0
749	94a	2	2.20209	1.4641	-1.10655	-0.596981	3	5	0
1333	422	2	1.23298	1.15376	-0.108216	1.13515	3	5	0
1055	142	2	-1.49491	0.581368	-0.592966	-0.231076	3	3	0
1323	422	3	0.025704	-0.737935	0.311291	0.588693	3	2	0
1283	12	3	-1.27226	0.912969	-0.800824	-0.33582	3	1	1
289	332	1	0.057574	-1.47192	1.75272	1.81364	3	5	0
1010	230	3	-1.34895	-0.696064	0.460353	-0.001888	3	1	1
249	332	1	0.176659	0.881454	-0.702877	-0.282695	3	3	0
687	357	1	-0.681361	-1.19348	2.18718	1.50637	3	2	0
398	260r	3	1.00509	-0.056078	-0.297247	0.156438	3	1	1
748	94a	1	2.05808	-0.156269	0.269508	0.893281	3	4	0
1097	231	1	-0.401928	-0.186606	-0.261345	-0.322084	3	1	1
250	332	1	-0.186818	-1.45827	1.71953	3.19362	3	5	0
236	332	2	-0.466179	-0.229012	-0.269757	-0.751697	3	3	0
751	396	2	0.719711	0.111098	-0.33995	-0.006708	3	5	0
684	357	2	-1.12254	0.00167	-0.432759	-0.651528	3	3	0
1393	365A	2	-0.640017	0.620165	-0.641234	-0.266021	3	4	0
744	94a	3	2.03205	0.140818	-0.508228	-0.583762	3	3	0
210	480	2	0.052897	-0.017856	-0.110205	-0.250547	3	4	0
516	332	2	-0.204817	-0.922312	0.545632	0.757982	3	1	1
1118	1a	1	0.182269	-1.16857	0.968047	1.16007	3	1	1
1275	12	3	-1.55828	-0.847347	0.199378	-1.00216	3	1	1
1109	1a	1	0.298834	-0.662533	0.833291	1.98769	3	5	0
852	10	2	0.747126	-1.49806	1.19495	-1.18561	3	1	1
1288	12	2	-1.24997	0.560236	-0.714399	-0.658102	3	1	1
1005	230	2	-0.915779	-0.778527	0.234676	-0.321491	3	1	1
262	332	3	-0.33112	-1.20257	0.740154	-0.53976	3	1	1
672	55	2	-0.698894	0.558564	-0.642468	-0.716602	3	3	0
1034	142	2	-1.34283	1.04383	-0.711704	-0.349984	3	3	0
668	55	1	-0.844572	-1.53559	1.96406	2.05552	3	3	0
1272	12	3	-2.39387	-0.571396	0.096545	0.21535	3	1	1
1113	1a	1	-0.334185	-1.31217	1.12954	0.908958	3	1	1
632	80a	3	0.617758	0.825468	-0.742456	-0.269431	3	3	0
670	55	2	-0.718	0.530315	-0.288949	0.023409	3	1	1
215	480	3	0.429832	0.898105	-0.607234	0.698868	3	4	0
1285	12	2	-1.52805	1.7847	-1.02636	-0.419217	3	5	0
842	80	2	0.250417	-1.11561	0.638038	-0.305758	3	1	1
313	332	2	0.203151	2.2887	-1.19489	-0.37724	3	5	0
365	2	1	-0.950748	-1.59166	2.03849	3.18876	3	4	0
583	103	1	-1.28632	0.875836	-0.373913	0.947752	3	5	0
1044	142	3	-1.28173	2.22765	-1.38846	-0.925903	3	3	0
46	560	3	1.57796	1.34421	-1.02887	-0.359354	3	3	0
1390	342	3	0.043987	-0.048174	-0.271822	-0.069306	3	1	1
1367	55	3	-1.02031	0.035745	-0.258033	-0.100044	3	1	1
1375	142	1	-1.13809	-0.082116	-0.312623	-0.220943	3	1	1
1321	422	2	0.398015	0.022902	-0.298507	0.178161	3	3	0
400	260r	2	1.11555	-0.789406	0.159043	-0.777158	3	1	1
855	10	3	1.37773	2.73969	-1.17032	-0.031	3	5	0
558	35	2	0.40566	-0.726039	0.121252	-0.688255	3	1	1
299	288	2	-0.115259	1.23984	-0.919575	-0.55389	3	4	0
988	230	3	-1.64275	-0.525221	0.228115	0.990095	3	4	0
1324	422	3	-0.023507	-1.57587	1.46338	-0.663926	3	1	1
886	241	2	0.834196	-0.597229	-0.029611	-1.03953	3	3	0
978	230	3	-1.67854	0.095623	-0.381934	-0.02718	3	1	1
974	230	3	-1.87689	0.105486	-0.466093	-0.534388	3	1	1
1211	260	3	-1.66501	0.036771	-0.403708	-0.374592	3	4	0
591	103	2	-0.397333	-0.577504	0.190676	-0.160707	3	1	1
491	167	2	0.593408	-0.58727	0.389593	-1.01703	3	1	1
989	230	3	-1.56062	-1.14966	0.78802	0.219353	3	1	1
203	480	2	-0.501157	-0.835154	0.347609	-0.334477	3	2	0
1386	342	2	-0.577456	0.007289	-0.411704	-0.847172	3	4	0
1004	230	2	-1.00897	0.770101	-0.760413	-0.420292	3	4	0
1098	231	2	-0.225078	1.4801	-0.807611	-0.158421	3	3	0
397	260r	3	1.19766	1.05192	-0.844509	0.099236	3	5	0
676	55	3	-0.809704	0.330655	-0.378408	0.151259	3	1	1
199	480	3	-0.462484	-1.04152	0.57685	-0.244266	3	1	1
1419	332	3	-0.335363	-1.08234	0.796155	1.09761	3	1	1
613	80a	1	0.093288	-1.88238	6.01692	2.06635	3	3	0
506	167	3	-0.090149	-0.621634	0.163438	-0.433916	3	1	1
1093	231	3	-0.624751	0.031306	-0.463788	-0.698105	3	1	1
681	55	3	-1.54305	0.279505	-0.648652	-1.02729	3	3	0
742	94a	3	2.06353	-0.003175	-0.308253	-0.102847	3	3	0
1040	142	2	-0.895403	-1.85672	2.80006	-0.025147	3	5	0
237	332	2	-0.340795	-0.341074	-0.143551	-0.261059	3	4	0
552	35	2	0.737739	-0.046237	-0.146687	-0.18794	3	3	0
1032	230	2	-0.903313	-0.128884	-0.046057	-0.255101	3	3	0
1037	142	2	-1.00255	-1.74658	2.45314	0.901151	3	1	1
1000	230	1	-1.05481	-1.36078	1.09785	0.088009	3	3	0
194	480	2	-0.175367	0.705062	-0.763965	-0.559393	3	3	0
508	332	3	-0.152951	0.191047	-0.483131	-0.250221	3	1	1
1127	260	1	-0.656588	-1.47924	1.60632	0.813129	3	5	0
737	603	3	1.70838	-0.723521	0.17452	-0.239027	3	2	0
1016	230	1	-0.813793	2.18292	-1.03357	-0.160986	3	3	0
1329	422	2	0.16709	-0.74626	0.073009	-1.35044	3	1	1
1133	342	2	-0.900292	0.534842	-0.633087	-0.210349	3	4	0
685	357	3	-1.01474	0.985507	-0.794805	0.043909	3	3	0
1280	12	3	-1.72736	-0.716378	0.179444	-0.229568	3	1	1
1019	230	3	-1.39959	0.313926	-0.55763	-0.389914	3	3	0
1042	142	3	-1.10896	0.808396	-0.683874	-0.267706	3	1	1
409	260r	3	0.666665	-0.858085	0.46534	0.002307	3	2	0
182	480	3	1.07377	0.930685	-0.885599	-0.452195	3	4	0
884	241	3	0.43931	-0.08504	-0.22028	0.025657	3	3	0
1269	243	3	-0.857038	-0.434245	0.340481	-0.412717	3	1	1
972	230	2	-2.01247	-0.799723	0.276623	-0.6042	3	3	0
27	560	3	1.20107	-0.772659	0.163249	-0.719117	3	2	0
677	55	3	-1.04672	0.163938	-0.379567	-0.829345	3	1	1
973	230	2	-2.06168	-0.629238	0.125609	-0.223249	3	3	0
1219	233	3	-1.64336	-0.086174	-0.334195	-0.249479	3	3	0
689	357	3	-1.16146	-0.974701	0.691533	1.33319	3	2	0
979	230	3	-1.65909	-0.374232	-0.029812	0.220322	3	3	0
1205	260	2	-0.98654	-0.592814	0.506896	0.736832	3	1	1
743	94a	2	1.67977	-0.255444	0.066082	0.850368	3	3	0
1078	486	1	1.10864	-1.57951	1.82222	1.38032	3	5	0
763	396	3	1.34491	-0.087723	-0.283609	0.157765	3	3	0
1087	231	2	-0.817508	-0.099342	-0.303367	-0.348042	3	3	0
758	396	2	1.66342	-0.128192	-0.408833	-1.11241	3	2	0
1080	582	3	-0.631294	-0.856271	0.386382	-0.050756	3	1	1
1012	230	1	-0.434198	-1.15757	1.93465	3.77198	3	5	0
191	480	3	-0.448613	1.08215	-1.00422	-0.808669	3	2	0
1195	260	2	-1.03266	0.963349	-0.788231	-0.283603	3	4	0
1382	342	3	-0.114961	-0.290881	-0.131412	-0.097663	3	1	1
1023	230	1	-0.05236	-0.976825	1.04489	2.2005	3	5	0
205	480	3	-0.392796	-1.0102	0.508143	-0.257577	3	1	1
994	230	2	-1.19713	1.478	-1.0057	-0.622603	3	4	0
755	396	2	1.2078	-0.449693	-0.112787	-0.72545	3	4	0
1029	230	2	-1.10061	0.623197	-0.517887	0.053504	3	3	0
1286	12	3	-1.8308	-0.486201	0.075426	0.157492	3	1	1
513	332	3	-0.304826	0.012826	-0.365753	-0.284717	3	1	1
366	2	2	-1.24236	0.079189	-0.289289	-0.173695	3	3	0
1208	233	2	-1.06315	1.3612	-0.819927	-0.14449	3	5	0
1306	21	2	-1.53342	-0.287212	-0.140529	-1.06971	3	3	0
1273	12	3	-2.28149	-0.674664	0.174658	0.095211	3	1	1
399	260r	3	1.05402	-0.688484	0.080199	-0.684647	3	3	0
246	332	3	0.061793	0.454751	-0.406818	-0.02533	3	3	0
372	260c	2	1.62294	-0.424422	-0.180373	-0.994479	3	1	1
532	260r	3	1.52492	-0.912158	0.324022	-0.63047	3	3	0
538	260r	3	0.795205	-0.955034	0.468815	0.006067	3	1	1
679	55	2	-1.38318	0.565346	-0.72329	-0.617516	3	4	0
530	260r	2	1.539	-1.33218	0.924363	-0.767559	3	1	1
848	80	2	1.38522	0.243075	-0.554621	-0.419328	3	3	0
31	560	3	1.39624	-0.823532	0.319539	-0.181508	3	2	0
196	480	3	-0.449739	-0.959996	0.449384	-0.246501	3	1	1
1282	12	3	-1.81914	-1.20408	0.726415	-0.438903	3	1	1
544	260r	2	0.940787	0.231104	-0.480323	-0.064238	3	4	0
255	480	2	0.766809	0.115303	0.161297	-0.650191	3	5	0
1095	231	2	-0.771049	0.693055	-0.764758	-0.295884	3	5	0
48	560	2	1.28641	1.47246	-1.07925	-0.338882	3	5	0
393	260r	2	1.14152	-0.05877	-0.351497	-0.404532	3	3	0
396	260r	3	0.934383	0.025438	-0.355074	-0.069254	3	4	0
287	332	1	-0.626719	-1.15793	1.62953	2.12797	3	4	0
1313	21	3	-1.66478	-0.250111	-0.041725	-0.542818	3	1	1
1131	260	2	-0.907056	-1.24603	1.17923	-0.179744	3	1	1
524	260c	2	0.885769	-1.20937	0.813911	0.226513	3	1	1
268	332	2	0.035004	2.24822	-1.47966	-1.46424	3	4	0
883	241	3	1.05993	0.756973	-0.844068	-0.658183	3	1	1
1030	230	3	-0.896144	1.06284	-0.817308	-0.559759	3	4	0
885	241	2	1.051	0.242495	-0.52985	-0.249947	3	4	0
887	241	3	0.677837	1.06678	-0.860892	-0.104714	3	4	0
539	260r	2	0.731349	-0.961419	0.443604	-0.490317	3	2	0
260	332	3	-0.180645	1.74123	-0.986481	-0.404505	3	4	0
256	332	1	-0.634812	-1.42164	1.3249	0.909532	3	5	0
519	332	2	-0.000802	0.689124	-0.625607	-0.454714	3	4	0
181	480	3	1.21462	0.701904	-0.350276	-0.191481	3	2	0
283	332	2	0.23721	0.873297	-0.645944	0.05527	3	3	0
392	260r	3	1.12895	-0.790212	0.13999	-1.0341	3	2	0
245	332	3	-0.241138	-1.42122	1.29119	0.73108	3	2	0
241	332	2	-0.15209	0.268106	-0.485763	-0.095363	3	3	0
879	241	2	1.01956	1.3643	-0.96603	-0.008575	3	5	0
533	260r	2	1.52166	-0.688995	0.085941	-0.588717	3	1	1
202	480	3	-0.341998	0.238488	-0.533867	-0.387505	3	5	0
216	480	3	0.62154	0.2814	-0.332671	0.043734	3	3	0
759	396	2	1.63368	-0.432447	-0.098091	-0.108129	3	2	0
493	167	2	0.059191	-0.522008	0.180678	-0.533982	3	1	1
1141	342	2	1.10998	-0.118904	0.589228	-0.606564	3	1	1
371	260c	3	1.0246	-0.952327	0.436502	-0.309646	3	3	0
1378	142	1	-1.06326	-1.39671	2.35029	4.54307	3	5	0
733	603	3	1.31628	-0.989728	0.476673	-0.225183	3	1	1
35	560	3	1.03722	-1.09132	0.671246	0.055721	3	1	1
195	480	3	-0.248995	0.159174	-0.494099	-0.37988	3	3	0
183	480	1	0.063795	-1.1037	0.681333	0.03954	3	1	1
541	260r	3	0.990392	-0.330884	-0.121413	0.034426	3	3	0
363	332	1	-0.624977	-0.765504	0.932296	1.8958	3	5	0
878	255	3	0.767367	1.49409	-0.97414	-0.027677	3	4	0
1020	230	2	-0.059972	0.182947	-0.504362	-0.560065	3	3	0
854	10	3	0.70711	-0.652602	0.150581	0.059449	3	2	0
300	288	3	-0.310951	-0.107905	-0.27827	-0.1325	3	3	0
264	332	2	-0.191052	-0.771059	0.102841	-1.23984	3	2	0
281	332	3	0.329857	0.1109	-0.356585	-0.388889	3	4	0
1009	230	3	-1.24035	0.121159	-0.287903	-0.077224	3	3	0
1006	230	3	-1.14092	0.572357	-0.599426	0.063236	3	1	1
478	365A	3	-0.022612	0.910717	-0.660023	-0.12474	3	4	0
1418	332	3	-0.103365	0.878365	-0.68745	-0.031915	3	3	0
269	332	3	-0.280278	-0.625628	0.154963	-0.104464	3	4	0
1119	1a	1	-0.09253	-1.6567	2.59435	4.57817	3	1	1
1058	142	1	-1.4127	-0.33834	0.093862	0.475147	3	4	0
243	332	3	-0.393008	-0.207952	-0.206402	-0.103458	3	4	0
522	332	3	0.323583	1.32319	-0.885297	-0.234738	3	3	0
42	560	3	1.42027	0.134216	-0.401479	-0.109602	3	2	0
741	94a	2	1.87619	0.270798	-0.365727	-0.133122	3	4	0
1049	142	1	-0.998491	0.39001	-0.43291	0.306958	3	5	0
49	560	2	1.66344	1.43228	-0.851863	0.302527	3	5	0
1046	142	2	-0.867353	2.46962	-1.34839	-0.771756	3	5	0
367	2	3	-1.59975	-0.238555	0.071749	-0.141094	3	1	1
688	357	2	-0.434434	-0.077313	-0.355754	-0.434116	3	2	0
34	560	3	1.11353	-0.413814	-0.144143	-0.726721	3	2	0
880	241	2	0.677515	0.342493	-0.674354	-0.879755	3	1	1
682	357	3	-0.96727	0.615858	-0.609148	-0.114636	3	3	0
1210	233	3	-1.65556	1.16672	-0.892198	-0.37339	3	3	0
212	480	2	0.309452	-0.184596	0.062645	0.047285	3	4	0
1015	230	2	-1.03513	1.07165	-0.812447	-0.178565	3	5	0
1079	486	2	0.952435	-1.00861	0.502048	-0.2801	3	1	1
1188	260	2	-1.50003	-1.20345	0.941199	-0.322808	3	1	1
1018	230	3	-1.34641	-0.648439	0.502476	-0.755663	3	1	1
871	255	3	0.269239	-0.792453	0.269999	-0.239718	3	1	1
1142	342	3	-0.498352	-0.329067	-0.29527	-1.45036	3	2	0
986	230	3	-1.23756	0.486591	-0.514726	-0.212107	3	3	0
849	10	3	1.03021	0.408185	-0.471042	0.275555	3	3	0
1145	10	1	1.47152	0.50896	-0.233893	1.10153	3	5	0
487	167	3	0.360934	0.428752	-0.30746	0.229306	3	4	0
1073	486	3	0.719504	-0.71497	0.368727	-0.710969	3	2	0
1279	12	1	-1.96272	-0.792961	0.619162	0.941411	3	1	1
1305	21	2	-1.41366	-0.105108	0.35257	0.016978	3	1	1
844	80	2	0.640174	-0.640766	0.059459	-0.714779	3	2	0
518	332	2	0.185464	-0.632991	0.066234	-0.724356	3	1	1
555	35	2	0.567008	0.955508	-0.759419	-1.05904	3	1	1
605	80a	1	0.245404	-0.604469	0.36403	0.115178	3	4	0
747	94a	2	2.12959	0.264755	-0.478245	-0.472189	3	5	0
609	80a	2	0.322159	-0.659499	0.181307	-0.947393	3	1	1
674	55	3	-1.34589	0.40922	-0.728818	-1.14492	3	1	1
875	255	3	0.476088	0.686243	-0.613631	-0.121586	3	4	0
1021	230	3	-0.032831	-0.60569	-0.012535	-0.864041	3	1	1
985	230	2	-1.31323	0.849283	-0.675588	-0.158765	3	5	0
1059	142	1	-1.4194	-0.428759	1.00637	2.85267	3	3	0
273	332	3	0.454235	-0.305291	-0.188848	-0.336942	3	2	0
523	332	2	0.105278	0.627083	-0.680763	-0.179139	3	4	0
1128	260	2	-0.298268	-1.23931	0.948491	-0.388211	3	1	1
1110	1a	2	-0.11739	0.579428	-0.519927	-0.022967	3	3	0
1284	12	2	-1.76614	0.157833	-0.343211	-0.453502	3	1	1
1035	142	1	-0.78901	-0.035051	0.331427	1.14951	3	4	0
1094	231	2	-0.321536	1.52753	-1.05606	-0.252566	3	5	0
559	35	2	0.855578	0.138108	-0.426841	-1.0042	3	1	1
204	480	2	-0.189479	0.301037	-0.527256	-0.132856	3	4	0
263	332	3	-0.336528	-1.16034	0.664345	-0.563946	3	1	1
1051	142	2	-1.3247	0.448288	-0.487274	-0.474746	3	3	0
201	480	2	-0.208806	0.858313	-0.94772	-1.22078	3	2	0
851	10	3	0.715428	-1.08702	0.606418	-0.294323	3	1	1
185	480	2	0.301672	0.661832	-0.471633	-0.009736	3	3	0
207	480	2	-0.157801	0.02862	-0.442103	-0.332038	3	1	1
1117	1a	1	-0.073092	-1.05744	0.69696	0.156393	3	1	1
537	260r	2	0.979215	-0.651432	0.123972	0.101155	3	2	0
734	603	3	1.25872	-0.863592	0.204491	-1.11691	3	2	0
1083	582	3	-0.407043	-0.106365	-0.335227	-0.339029	3	3	0
1424	480	1	1.07616	-0.447985	0.15077	0.376108	3	5	0
1318	422	2	0.321894	0.086835	-0.532394	-0.977166	3	1	1
753	396	2	1.15788	-0.749165	0.173626	-0.377255	3	2	0
1425	480	2	1.09495	-0.926905	0.316945	-0.738728	3	1	1
757	396	2	1.40145	-0.026533	-0.437834	-0.771421	3	3	0
242	332	3	-0.312822	-0.202104	-0.361244	-1.06592	3	1	1
1420	480	2	0.189212	1.03008	-0.753827	-0.045922	3	3	0
762	396	2	1.63211	-0.591331	-0.071948	-1.28424	3	2	0
1124	1a	3	-0.67743	-1.17736	0.671561	-0.491386	3	1	1
610	80a	1	0.605152	-0.467836	0.451563	0.732945	3	3	0
1121	1a	3	-0.505978	-0.751448	0.374129	-0.393868	3	1	1
1116	1a	1	-0.227031	-1.19703	0.864534	0.584857	3	1	1
739	94a	1	1.61398	-1.0504	2.44839	3.67538	3	5	0
731	94a	3	1.49474	0.430235	-0.580197	0.032142	3	3	0
1111	1a	3	0.253174	-0.138109	-0.296278	-0.301873	3	1	1
582	103	3	-1.82404	0.671971	-0.615003	0.279623	3	3	0
1112	1a	2	-0.369649	-0.594477	0.013029	-0.344976	3	1	1
495	167	3	-0.27016	-0.91956	0.511896	0.847306	3	1	1
315	103	1	-0.221113	-1.58122	2.14677	3.51218	3	5	0
503	332	2	0.056246	0.862214	-0.564934	0.058008	3	3	0
497	167	3	0.027258	-0.455676	-0.106616	-0.799812	3	4	0
486	167	2	0.181764	0.878489	-0.74369	-0.895385	3	1	1
244	332	2	0.233558	1.08774	-0.695258	-0.174518	3	3	0
1267	12	3	-1.19754	0.876476	-0.696316	-0.154176	3	3	0
593	103	2	-1.53366	0.419497	-0.491077	-0.056714	3	3	0
686	357	2	-0.915293	-0.937228	0.562317	-0.43734	3	1	1
1001	230	1	-0.950185	-1.79905	2.70386	1.86847	3	5	0
877	255	3	0.175086	-0.347463	-0.119675	0.195175	3	3	0
1287	12	3	-1.23636	0.576902	-0.543715	0.020276	3	3	0
217	480	2	0.354818	0.739615	-0.768234	-0.524568	3	4	0
1203	260	1	-1.12567	-0.66029	0.207198	0.272734	3	1	1
1126	260	1	-0.347517	-1.03675	1.26854	2.67204	3	1	1
1125	1a	3	-0.486002	-0.963768	0.410825	-0.519746	3	1	1
37	560	2	1.20801	-0.972229	0.341791	-1.02258	3	4	0
373	260c	3	1.30661	0.977591	-0.868863	-0.382551	3	4	0
1088	231	3	-0.789944	-1.29142	0.955631	-0.447052	3	1	1
1204	260	3	-0.994883	-0.804589	0.410687	-0.155945	3	1	1
298	288	3	-0.205496	0.106439	-0.284314	0.592112	3	3	0
1220	233	3	-1.30945	-0.709674	0.032913	-1.33699	3	1	1
678	55	3	-1.38907	-0.418638	-0.020368	-0.414119	3	1	1
889	241	3	0.71399	-0.195099	-0.19085	0.073273	3	3	0
1033	142	2	-1.04194	-0.020885	-0.329888	-0.870173	3	1	1
1199	260	2	-1.45075	-0.561632	0.11624	-0.185217	3	3	0
612	80a	2	0.31832	-0.484857	0.206355	-0.619184	3	2	0
28	560	3	1.26399	-1.24612	0.830722	-0.54416	3	1	1
248	332	3	0.207471	0.136676	-0.178534	0.342262	3	4	0
1377	142	1	-1.21189	1.84133	-1.14231	-0.199642	3	4	0
1201	260	2	-1.87099	-1.39823	1.19097	0.022459	3	1	1
995	230	2	-0.75943	-0.19845	-0.384151	-1.38959	3	1	1
607	80a	3	0.473572	0.15937	-0.237242	-1.12105	3	1	1
846	80	2	1.03699	0.902596	-0.683458	0.205627	3	5	0
412	260r	3	1.03658	-0.81955	0.254686	-0.2055	3	2	0
669	55	3	-0.834044	-0.27605	-0.157554	-0.062768	3	1	1
1389	342	2	1.16618	0.255927	-0.269404	-0.57703	3	3	0
1366	55	2	-0.959231	1.20029	-0.892147	-0.524359	3	3	0
499	167	2	0.320475	0.659179	-0.631513	-0.748927	3	4	0
1122	1a	2	-0.477514	-1.26303	0.986634	-0.614162	3	1	1
1357	357	3	-0.775317	-0.163241	-0.16035	0.224335	3	3	0
850	10	3	0.695076	-1.09823	0.562292	-0.713093	3	3	0
1312	21	2	-1.68684	0.386581	0.764068	0.364499	3	3	0
51	560	2	1.53627	0.906644	-0.878258	-0.589008	3	5	0
369	260c	3	1.37378	0.561848	-0.581972	0.195862	3	3	0
184	480	1	-0.143025	-1.3108	1.114	0.150026	3	1	1
403	260r	3	0.645674	-0.537492	0.081018	0.008503	3	3	0
1076	486	1	1.06072	-0.797774	0.722801	0.653645	3	4	0
213	480	3	0.448245	-1.29967	1.74522	-0.445988	3	1	1
1090	231	3	-0.98678	-0.846409	0.347458	-0.063876	3	1	1
1052	142	2	-1.01594	0.202455	-0.625116	-1.20573	3	5	0
414	365A	1	-0.745631	-1.17204	1.62545	2.98769	3	5	0
1096	231	1	-0.47355	0.276025	-0.041587	0.567307	3	5	0
1091	231	1	-1.07509	-0.8771	0.273198	-0.671948	3	1	1
1354	357	1	-0.7542	-1.01682	1.29686	1.90985	3	5	0
261	332	2	-0.041501	-0.695393	0.299806	-0.107659	3	2	0
1075	486	2	1.28456	-1.73819	2.52504	1.23788	3	5	0
1074	486	1	1.18478	-1.56705	2.43022	3.36402	3	5	0
592	103	1	0.296101	-1.44064	1.21225	0.012856	3	2	0
1057	142	2	-1.14284	0.727542	-0.847266	-0.860204	3	3	0
1136	342	1	-0.493724	0.893948	-0.861937	-0.663477	3	2	0
1137	342	2	-0.271748	0.624882	-0.735202	-1.27101	3	2	0
1327	422	2	0.335862	0.028	-0.521627	-1.20811	3	1	1
1206	260	3	-1.51026	-0.847197	0.357116	0.049127	3	1	1
1314	21	2	-1.25742	0.475002	-0.415923	0.123047	3	3	0
1139	342	3	0.968707	-0.473903	-0.08269	-0.446987	3	1	1
1130	260	2	-1.33279	-0.638083	0.05019	-0.513538	3	4	0
1385	342	1	-0.728613	-0.498037	0.301456	0.812895	3	5	0
1332	422	2	0.197709	-1.14797	0.609667	-0.67518	3	2	0
1384	342	2	-0.810204	0.968002	-0.822433	-0.267385	3	3	0
1041	142	2	-1.24206	2.5446	-1.26702	-0.268613	3	5	0
673	55	3	-1.13832	0.530673	-0.629435	-0.573855	3	1	1
272	332	1	-0.180111	-1.74819	5.01163	7.93677	3	5	0
1198	260	2	-1.44236	-0.947319	0.33144	-0.918832	3	1	1
314	255	1	0.879447	-1.34946	2.71405	3.11459	3	5	0
402	260r	3	0.822991	-0.313412	-0.145339	0.123803	3	3	0
1047	142	1	-1.13271	-0.687612	1.89746	2.46795	3	5	0
1328	422	2	0.184011	-0.432302	-0.2078	-1.32013	3	1	1
588	103	2	-0.540861	0.214132	-0.377137	0.005226	3	3	0
1103	12	2	-0.649563	0.492706	-0.291568	0.706669	3	5	0
1138	342	3	0.866158	0.541645	-0.616338	-0.211228	3	2	0
735	603	3	1.62977	0.516858	-0.72805	-0.666882	3	2	0
1370	142	3	-1.26421	0.857892	-0.578597	-0.110943	3	1	1
1325	422	2	0.328755	0.162528	-0.575411	-0.960224	3	2	0
1213	233	1	-0.902139	0.799686	-0.52567	0.302293	3	3	0
1380	342	3	0.016071	0.379699	-0.584075	-0.425622	3	4	0
663	174	2	1.18174	0.104505	-0.545352	-0.982435	3	3	0
981	230	2	-1.05979	0.570586	-0.281758	0.049206	3	5	0
180	480	1	0.455871	-1.6204	2.00171	1.04231	3	5	0
479	365A	3	-1.17174	-0.161359	-0.231412	-0.165303	3	2	0
1270	12	3	-2.00942	0.624277	-0.633565	-0.198021	3	3	0
608	80a	2	0.461303	-0.516312	0.277139	-0.768206	3	1	1
41	560	3	1.04424	-1.06232	0.665327	0.537895	3	1	1
404	260r	2	0.560984	-1.22148	0.85893	-0.38499	3	2	0
1089	231	2	-0.744188	0.549152	-0.692664	-0.492353	3	1	1
557	35	3	0.371879	-0.82324	0.294807	-0.375948	3	1	1
1043	142	2	-1.26819	2.55233	-1.3725	-0.71198	3	4	0
756	396	2	1.3398	-0.0988	-0.423075	-1.04583	3	2	0
1086	582	3	-0.636058	-1.07618	0.539701	-0.371383	3	1	1
1054	142	1	-1.19925	-1.47814	1.90467	3.42563	3	3	0
1107	1a	2	-0.13792	0.385708	-0.568599	-0.243645	3	5	0
1056	142	3	-1.63836	0.602492	-0.229888	0.11225	3	5	0
1196	260	3	-0.760017	-0.527615	0.09186	0.316024	3	1	1
1002	230	2	-0.802896	-1.86431	3.00505	1.12091	3	5	0
1217	233	2	-1.48034	0.577543	-0.610659	-0.150786	3	4	0
1414	332	2	-0.131271	1.05652	-0.891354	-0.454169	3	4	0
982	230	3	-1.39172	0.492489	-0.503985	0.161976	3	4	0
490	167	3	0.36932	-1.07622	0.604768	0.095232	3	1	1
1372	142	3	-1.34377	-0.593096	0.35859	0.145781	3	1	1
1120	1a	3	-0.471034	-0.608956	0.054875	-0.221464	3	1	1
1085	582	3	-0.292321	0.058279	-0.461358	-0.775342	3	1	1
1007	230	2	-0.942752	0.114897	-0.545743	-0.91638	3	3	0
1071	486	3	0.951704	0.531789	-0.494754	-0.046127	3	5	0
1105	1a	2	-1.10839	0.636988	-0.798129	-0.729834	3	4	0
1334	422	1	1.5889	-1.44212	1.4803	0.920915	3	5	0
296	288	2	0.388589	1.3117	-0.811012	0.154666	3	3	0
984	230	3	-1.48384	0.042356	-0.315683	0.176847	3	1	1
364	2	3	-0.999704	0.866082	-0.465627	0.047162	3	3	0
44	560	2	1.86955	1.40984	-1.01363	-0.388653	3	4	0
1326	422	2	0.373996	-0.61336	0.042496	-0.50107	3	4	0
1123	1a	3	-0.489971	-1.02887	1.01104	-0.78424	3	1	1
1331	422	3	-0.001596	-0.370595	-0.114008	-0.267016	3	4	0
1209	260	3	-1.06051	0.42132	-0.579706	-0.356708	3	3	0
288	332	2	-0.131305	-1.67291	2.39803	2.53272	3	5	0
187	480	1	-0.280971	0.374168	-0.740177	-1.58108	3	2	0
1363	365A	1	-0.21558	-0.377282	0.013343	0.215649	3	3	0
1022	167	1	-0.308814	-1.01984	1.56448	2.93027	3	5	0
535	260r	2	1.06819	-1.01169	0.430886	-0.794608	3	1	1
206	480	2	-0.250121	1.76767	-1.23509	-0.626111	3	2	0
43	560	2	1.62839	1.42638	-1.03459	-0.22096	3	5	0
999	230	2	-0.943233	0.479012	-0.75549	-1.0334	3	3	0
1192	260	3	-1.53862	-0.639097	0.228241	0.385148	3	1	1
188	480	1	0.303034	-0.263673	-0.084214	-0.178496	3	4	0
186	480	3	-0.314227	-0.669436	0.343516	1.02439	3	1	1
30	560	3	1.5253	-0.284926	-0.221501	-0.389773	3	3	0
528	260r	3	1.34776	-0.956929	0.457608	0.194199	3	1	1
732	603	3	1.39536	-1.17808	0.62474	-0.897689	3	1	1
1028	230	3	-0.890279	-0.519957	-0.011087	-0.481704	3	1	1
1415	332	3	0.002498	0.254333	-0.364556	-0.018515	3	3	0
500	167	2	-0.004358	1.12898	-0.776734	-0.176442	3	4	0
502	167	2	-0.132705	-0.297513	0.05213	-0.102441	3	3	0
876	255	3	0.301066	0.96944	-0.770702	0.226879	3	3	0
1277	12	2	-2.13575	-0.489047	-0.05622	-0.365204	3	1	1
219	480	2	0.722573	-0.638535	0.387264	-0.147074	3	4	0
1388	342	3	0.680792	0.638801	-0.586758	-0.311099	3	4	0
1106	12	3	-0.588406	0.757273	-0.656774	-0.101993	3	3	0
489	167	1	0.436606	-1.5355	1.38074	-0.497084	3	1	1
1276	12	3	-2.19997	-0.583553	0.038303	-0.247538	3	1	1
1212	260	2	-1.02201	-0.336012	0.053855	0.058418	3	3	0
1011	230	2	-1.06632	0.311956	-0.462919	-0.525469	3	3	0
1317	422	3	0.002575	0.519228	-0.593482	0.049335	3	3	0
190	480	2	-0.097558	1.00563	-0.878736	-0.290855	3	4	0
1027	230	3	-0.512762	-0.21961	-0.20372	-0.160475	3	1	1
504	167	1	-0.434775	1.06675	-0.89687	-0.430334	3	1	1
1330	422	3	-0.11448	-1.3914	1.03222	-0.641888	3	1	1
1025	230	1	-0.386811	1.23819	-0.85559	-0.003735	3	5	0
411	260r	3	1.1802	0.735741	-0.541637	0.219997	3	4	0
267	332	2	-0.139133	0.858647	-0.73286	0.120176	3	1	1
1365	365A	1	-0.337668	-1.45832	2.52425	3.53812	3	5	0
1289	12	3	-1.6665	-1.35806	1.0748	0.092944	3	1	1
271	332	2	0.371038	1.92678	-1.09221	-0.683503	3	5	0
980	230	3	-1.28575	0.735236	-0.661861	-0.391786	3	4	0
192	480	3	-0.447982	1.47306	-1.21402	-1.42327	3	2	0
571	359	2	0.880515	1.82295	-1.16789	-0.721503	4	4	0
1240	5	1	-1.47338	-1.56191	2.15476	2.83991	4	5	0
376	144	3	1.23881	0.171401	-0.447103	-0.17043	4	4	0
569	359	1	0.9796	-0.267595	0.392452	1.3417	4	2	0
1245	5	3	-1.84767	0.245457	-0.415381	-0.545055	4	1	1
1239	5	2	-1.33633	-0.020659	-0.439194	-0.814183	4	3	0
386	144	2	1.31969	0.23364	-0.5349	-0.282938	4	3	0
1236	5	2	-1.45285	-0.310696	-0.051573	-0.29989	4	3	0
383	144	1	1.39252	-1.31573	7.23336	3.50328	4	1	1
1066	144a	1	1.3407	-1.32015	1.01154	0.134981	4	2	0
640	354	2	0.4216	-0.454824	-0.144496	-0.904215	4	1	1
1143	144a	3	1.17957	0.447247	-0.570022	-0.158402	4	3	0
570	359	1	1.06717	-1.51225	6.5476	5.60155	4	5	0
1237	5	2	-1.53712	-0.37764	0.219187	0.383472	4	4	0
1253	5	3	-1.87913	-0.363067	0.106292	0.739964	4	1	1
375	144	3	1.02786	-0.684965	0.138529	-0.024227	4	2	0
659	328	3	0.995001	0.696198	-0.767579	-0.356873	4	1	1
391	144	3	0.731267	-0.890036	0.437472	-0.015241	4	1	1
578	359	1	0.764788	1.03877	-0.558424	0.007647	4	3	0
384	144	2	0.924414	-0.115024	1.15301	0.195684	4	1	1
566	359	3	0.500525	0.994741	-0.761156	-0.502041	4	3	0
1248	5	3	-1.14669	-0.101586	-0.351283	-0.40998	4	1	1
1244	5	2	-1.80452	0.189327	-0.251611	0.168819	4	3	0
1252	5	3	-1.83182	-1.67232	1.83548	-0.188389	4	1	1
638	354	2	0.837482	1.31507	-0.822685	-0.304947	4	4	0
1062	144a	2	1.45006	2.00282	-1.15792	-0.410197	4	3	0
1257	5	1	-2.11641	-1.74692	2.54645	1.76148	4	5	0
630	354	3	0.728159	0.708671	-0.864708	-0.918184	4	4	0
573	359	1	1.53604	-1.88774	4.12129	1.64803	4	2	0
1063	144a	3	1.37387	0.724266	-0.679806	-0.131926	4	3	0
1064	144a	1	1.68712	-0.869009	0.483007	0.45705	4	1	1
1233	5	3	-1.72664	-0.751677	0.147936	-0.685899	4	1	1
575	359	1	0.762305	1.19076	-0.376671	0.276399	4	5	0
637	354	3	0.605326	0.31622	-0.709777	-1.58861	4	1	1
1234	5	2	-1.42016	0.512368	-0.450981	0.172165	4	5	0
374	144	2	1.25233	-0.430004	-0.082388	-0.069412	4	3	0
1241	5	1	-1.55988	-1.38768	1.57465	2.37963	4	1	1
387	144	2	1.42625	1.18146	-0.814072	0.351323	4	5	0
636	354	3	0.476853	-1.24468	0.802816	-0.561682	4	1	1
661	328	2	1.14921	1.14603	-0.979089	-0.38372	4	3	0
574	359	1	1.42458	-1.59281	2.76417	1.4082	4	5	0
1256	5	2	-2.07272	1.15884	-0.798293	-0.127433	4	4	0
563	141	2	2.23216	1.35787	-0.970475	-0.115137	4	3	0
579	359	1	0.619062	1.19927	-0.681015	-0.107505	4	4	0
276	144b	2	1.95968	1.08693	-0.962907	-0.582379	4	1	1
568	359	3	0.854423	1.75459	-1.10993	-0.976358	4	2	0
1060	144a	3	1.22391	0.869649	-0.773825	-0.002897	4	4	0
1230	5	2	-1.17619	0.186566	-0.345025	-0.191233	4	3	0
572	359	1	1.104	-1.30798	1.66539	2.43503	4	5	0
1254	5	3	-2.2904	-0.731299	0.262519	0.069614	4	1	1
390	144	2	0.731628	0.05655	-0.494326	-0.830222	4	3	0
639	354	2	0.720716	1.25482	-1.04448	-0.630304	4	5	0
280	144b	3	1.60766	0.669125	-0.727584	-0.26585	4	3	0
279	144b	2	1.47561	-0.498801	-0.067868	-0.549296	4	2	0
564	141	2	1.83625	0.573094	-0.69221	-0.243096	4	3	0
1249	5	3	-1.55509	0.64898	-0.70032	-0.571816	4	1	1
633	354	3	0.433017	-0.411714	0.021063	0.340084	4	1	1
277	144b	2	1.84426	1.10937	-0.953475	-0.527632	4	4	0
381	144	3	1.05618	0.22372	-0.608329	-0.908835	4	2	0
278	144b	1	1.72522	-1.09084	0.879532	0.896601	4	1	1
546	195	3	1.32921	-0.002808	-0.408417	-0.546045	4	1	1
389	144	2	1.29283	0.512888	-0.673976	-0.543117	4	3	0
380	144	2	0.939122	-0.247206	-0.248248	-0.612046	4	1	1
1251	5	2	-1.86436	0.512148	-0.566899	-0.385479	4	3	0
1061	144a	1	1.54809	-0.322844	-0.206226	-0.556711	4	1	1
1250	5	3	-1.68282	0.240901	-0.39517	-0.430316	4	4	0
576	359	3	0.611494	0.573287	-0.572666	-0.355478	4	2	0
577	359	2	0.67929	1.12158	-0.78337	-0.371813	4	3	0
1065	144a	2	1.38467	1.40909	-0.951384	-0.331986	4	3	0
545	195	2	1.8452	1.16188	-0.891719	-0.046539	4	3	0
1229	5	3	-1.47676	-0.465974	0.026453	-0.124544	4	1	1
1228	5	3	-1.79956	-0.227033	-0.124083	-0.03806	4	3	0
658	328	3	1.13468	-0.247428	-0.167163	0.07771	4	1	1
567	359	3	0.355545	-0.23802	-0.188923	-0.264575	4	1	1
1242	5	1	-1.75295	-1.51754	1.56363	0.913856	4	1	1
1238	5	3	-1.27738	-0.914014	0.392011	-0.40178	4	1	1
660	328	2	0.872894	1.73453	-1.20604	-0.518837	4	3	0
1068	144a	1	1.31667	0.369205	-0.586657	-0.18813	4	2	0
388	144	1	1.56546	-0.798384	1.09433	0.587254	4	2	0
635	354	3	0.364638	-0.313987	-0.28949	-1.22154	4	1	1
562	141	3	2.34398	0.607746	-0.732155	-0.431793	4	1	1
1144	144a	2	1.3311	2.14138	-1.26164	-0.449459	4	5	0
634	354	2	0.378957	-0.389141	-0.138917	-0.981408	4	4	0
1246	5	3	-2.11847	0.596431	-0.608707	-0.067329	4	1	1
274	144b	3	1.7398	0.792605	-0.659759	0.449254	4	3	0
1227	5	3	-1.80085	1.09517	-0.819386	-0.069681	4	4	0
1232	5	3	-1.36556	0.087701	-0.45088	-0.778837	4	4	0
1067	144a	1	1.2942	-0.139961	-0.077804	0.215463	4	1	1
379	144	2	1.26684	1.56116	-1.04238	-0.102529	4	5	0
378	144	3	0.972205	-0.01843	-0.357152	-0.082958	4	3	0
543	144	2	1.16058	-0.249678	0.327259	-0.033393	4	3	0
385	144	2	1.28691	0.296493	-0.222118	0.180595	4	4	0
1231	5	2	-1.36366	-0.532782	0.043566	-1.02634	4	1	1
377	144	3	0.963121	-1.02311	0.490702	-0.334451	4	1	1
1235	5	2	-1.61813	-0.207326	-0.317635	-0.761745	4	3	0

## Sheet: S2_Code_Sheet
Name	Description	Variable Type	Detail
UniqueID	Unique identifier for each land use unit	numeric	Links data to ArcGIS Shapefile
tract	Unique identifier for each ownership tract	alpha-numeric	Original United States Forest Service Purchase Record Identifier
rtp	Average Relative Topographic Position	categorical	1=bottomland; 2=side slope; 3 flat upland
cd	Average Field Cost Distance Index	continous	Unit increase indicates increase in weighted cost distance to nearest market town
fslp	Average Field Slope Steepness	continous	Unit increase indicates increase in steepness
ftwi	Average Field Topographic Wetness Index	continous	Unit increase indicates increase in modelled soil wetness
fslpcv	Average Field Slope Coefficient of Variation	continous	Unit increase indicates increase in slope variation
landTenure	Land Tenure Type	categorical	1=Ababdoned; 2=Sharecropper; 3=Fixed Renter; 4=Owner
luclass	Land Use Class	categorical	1=Active agricultural field; 2=Abandoned field;3= Young Pine Forest; 4=Mature Pine Forest; 5=Hardwood Forest
Cultivated	Presence/Absence of Active Agricultural Field	binary	1=active agricultural field; 0=not active agricultural field

## Sheet: S3_Analysis_Instructions
Analysis	Stata 11.2 Code
M-logit	mlogit luclass rtp cd fslp ftwi fslpcv, baseoutcome(5) rrr
Logit	by landtenure, sort : logit cultivated rtp cd fslp ftwi fslpcv, or
