# Supplementary material
Source: MDPI journal article supplement (https://www.mdpi.com/2073-445X/6/2/32)
Supplement: s2 [file s2]

Archive with 3 entries (3 files):
- land-06-00032.zip
- land-06-00032-tex.zip
- land-06-00032.pdf
