# Supplementary material
Source: MDPI journal article supplement (https://www.mdpi.com/2073-445X/6/2/32)
Supplement: s2 [file s2]

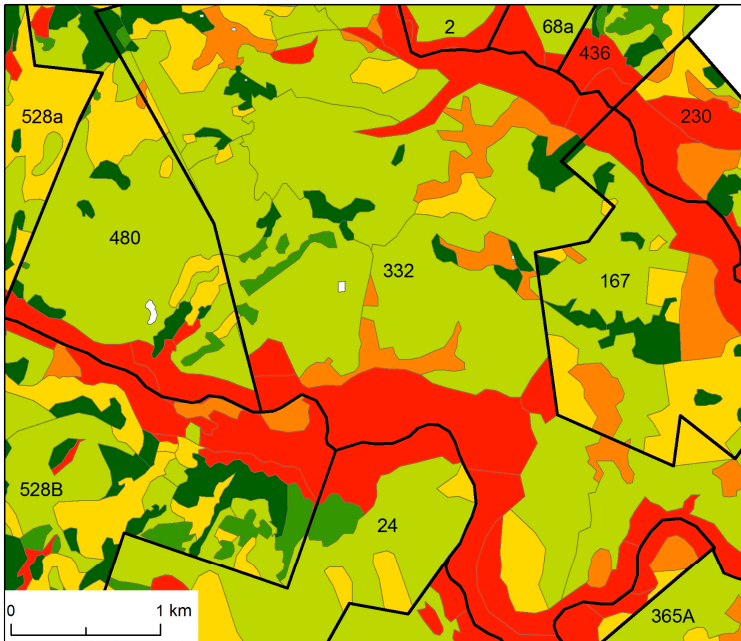

### Land Use Class

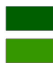

Agricultural Field

Abandoned Field

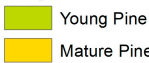

Young Pine

Mature Pine

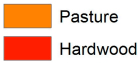

Pasture

Hardwood

Tract Boundary  
with Unique Identifier

528B
