# Supplementary material
Source: MDPI journal article supplement (https://www.mdpi.com/2073-445X/6/2/32)
Supplement: s2 [file s2]

RTP

Active Agricultural Field  
Abandoned Field  
Young Pine Forest  
Mature Pine Forest

CDI

Active Agricultural Field  
Abandoned Field  
Young Pine Forest\*  
Mature Pine Forest\*

Slope

Active Agricultural Field  
Abandoned Field  
Young Pine Forest  
Mature Pine Forest

TWI

Active Agricultural Field  
Abandoned Field  
Young Pine Forest  
Mature Pine Forest

SlopeCV

Active Agricultural Field  
Abandoned Field  
Young Pine Forest\*  
Mature Pine Forest\*

Negative Effect      Positive Effect

0 0.5 1 1.5 2 2.5 3 3.5 4 4.5 5
