# Supplementary material
Source: MDPI journal article supplement (https://www.mdpi.com/2073-445X/6/2/32)

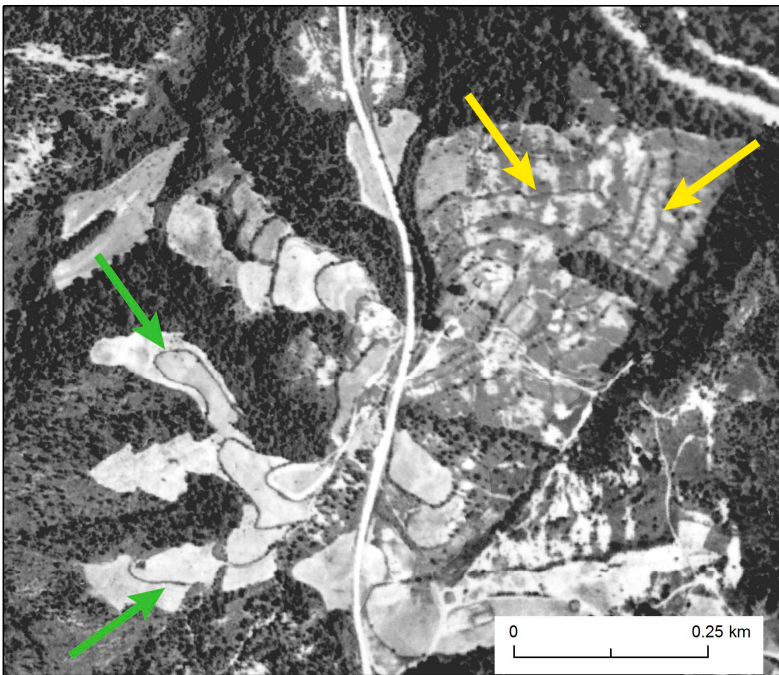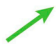

Bench Terrace  
Active Agricultural Field

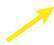

Bench Terrace  
Abandoned Agricultural Field

Supplement: s2 [file s2]

# Union County Cotton Production

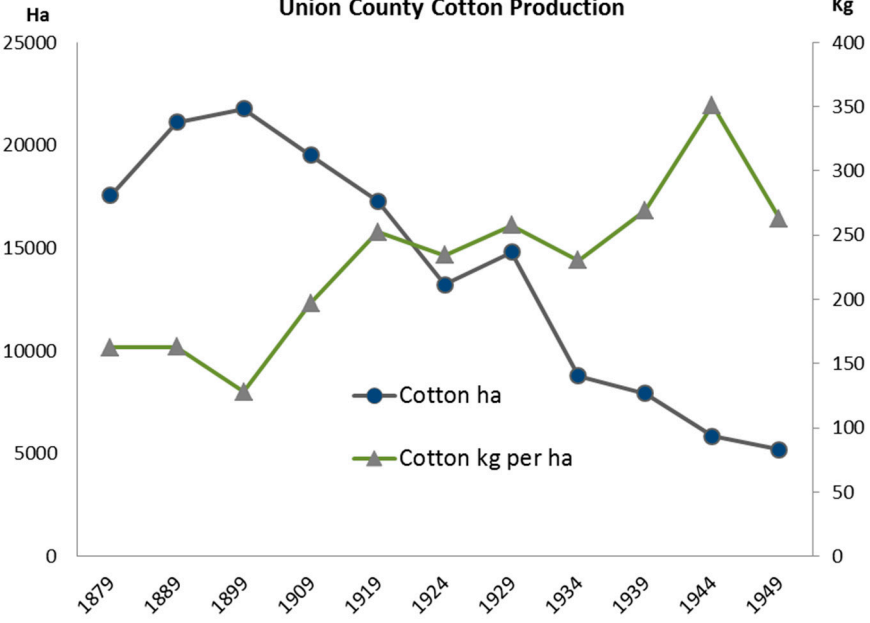

Supplement: s2 [file s2]

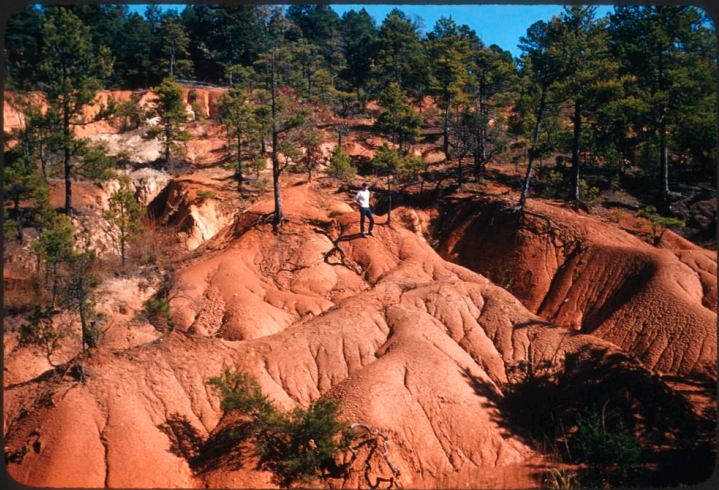

Supplement: s2 [file s2]

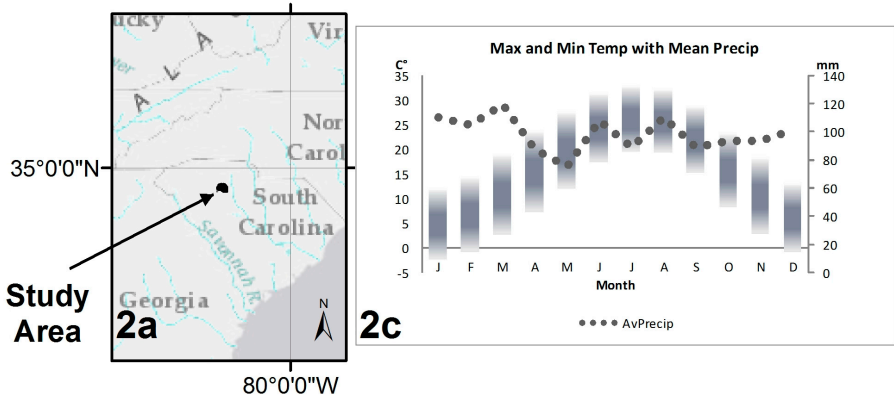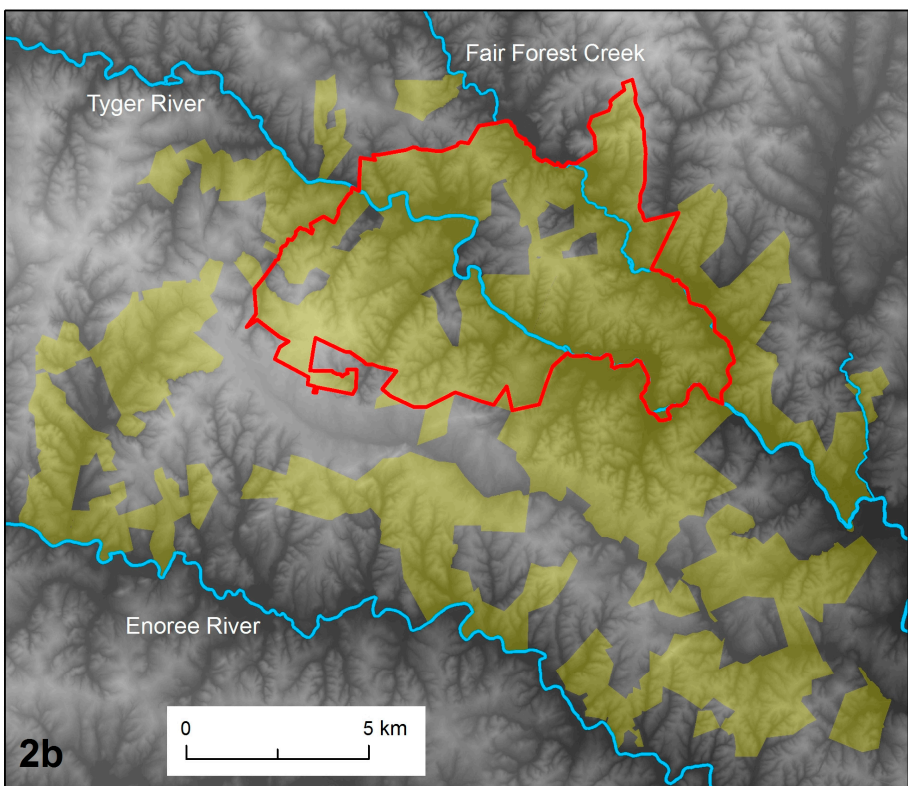

Surface area included in study

Calhoun Experimental Forest

Supplement: s2 [file s2]

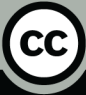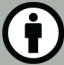

BY

Supplement: s2 [file s2]

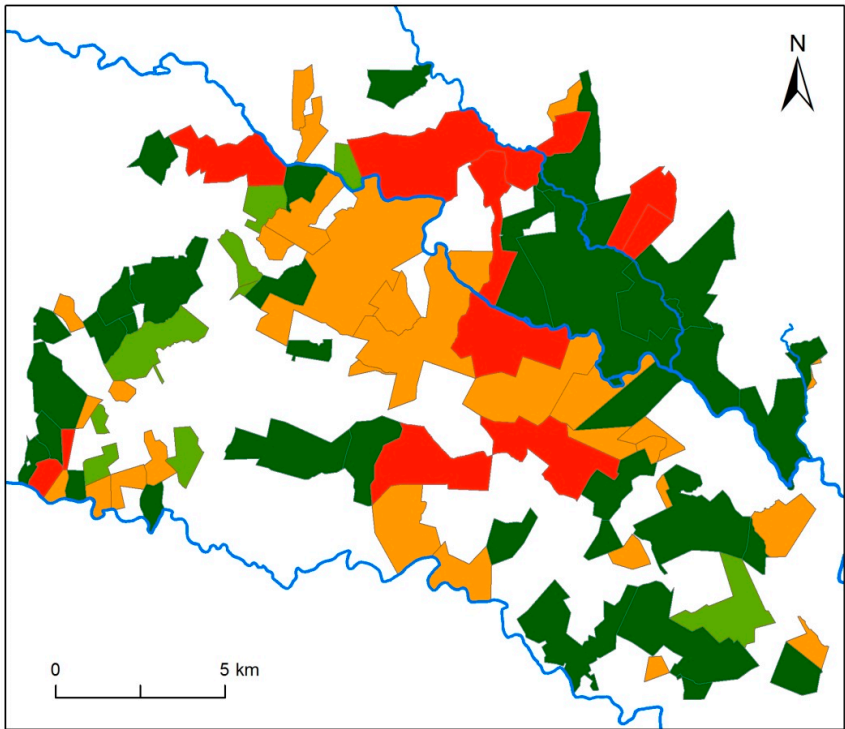

Abandoned  
Sharecropper

Fixed Rent Tenant  
Owner Operated

Supplement: s2 [file s2]

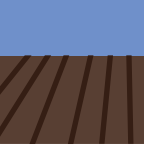

*land*

Supplement: s2 [file s2]

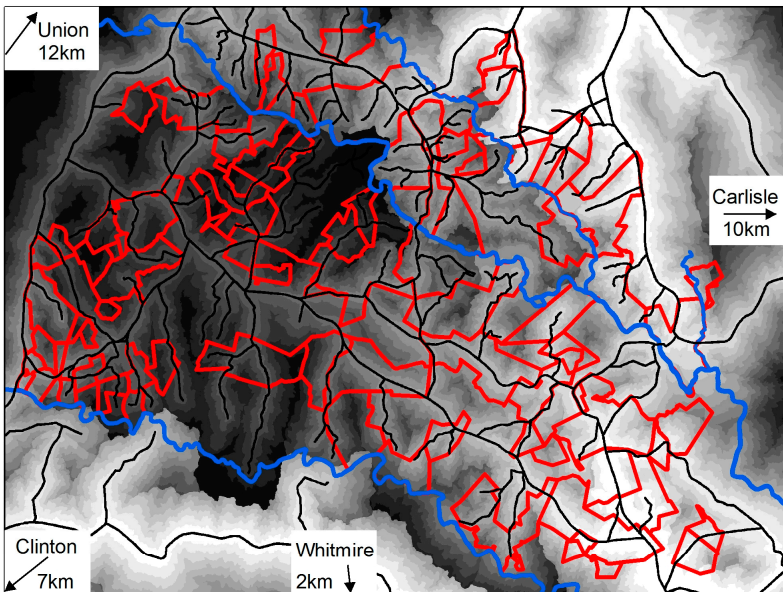

-  Purchase tracts
-  Road Network
-  Rivers

**Cost Distance Index**  
Cost/10m<sup>2</sup>  
High : 22746  
Low : 134

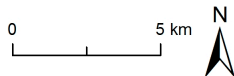

Supplement: s2 [file s2]
